# Supplementary material
Source: publisher figshare collection journal article supplement (https://acs.figshare.com/ndownloader/files/15143018)
Supplement: Supplementary file 1 [file 15143018]

## **Supporting Information**

### **Criteria Air Pollutant and Greenhouse Gases Emissions from U.S. Refineries Allocated to Refinery Products**

Pingping Sun,<sup>a</sup> Ben Young,<sup>b</sup> Amgad Elgowainy,<sup>a\*</sup> Zifeng Lu,<sup>a</sup> Michael Wang,<sup>a</sup> Ben Morelli,<sup>b</sup>  
Troy Hawkins<sup>a</sup>

<sup>a</sup> Energy Systems Division, Argonne National Laboratory, 9700 S. Cass Avenue, Lemont, Illinois 60439, USA.

<sup>b</sup> Eastern Research Group, Inc. (ERG), 110 Hartwell Avenue #1, Lexington, Massachusetts 02421, USA.

\* Email: [aelgowainy@anl.gov](mailto:aelgowainy@anl.gov)

## Contents

|                                                                                                                                                                                           |    |
|-------------------------------------------------------------------------------------------------------------------------------------------------------------------------------------------|----|
| 1. Refinery Fuels Combustion Emission Factor .....                                                                                                                                        | 3  |
| 1.1 Refinery Fuels Consumption .....                                                                                                                                                      | 3  |
| 1.2 Refinery Fuels Combustion Emission Factors .....                                                                                                                                      | 6  |
| 2. U.S. Refinery Emissions per Crude Throughput .....                                                                                                                                     | 8  |
| 3. U.S. Refinery Process Unit Capacity and Energy Use .....                                                                                                                               | 10 |
| Validating Energy Consumption at Refineries .....                                                                                                                                         | 15 |
| 4. Refinery Process Unit Emissions.....                                                                                                                                                   | 15 |
| 5. U.S. Refinery Final Products .....                                                                                                                                                     | 18 |
| 6. Comparison of PRELIM Derived Products with EIA Reported Products .....                                                                                                                 | 20 |
| 7. U.S. Refinery Unit Emission Allocations to Products.....                                                                                                                               | 22 |
| 8. Emissions of Refinery Final Products .....                                                                                                                                             | 25 |
|                                                                                                                                                                                           |    |
| Figure S1. U.S. Refinery CAP and GHG Emissions per MJ Crude Processed in 2014, with Capacity Weighted Contribution from Each PADD. ....                                                   | 9  |
| Figure S2. Shares of Process Emissions, Combustion Emissions, and Facility-wide Emissions for U.S. Refinery Total Emissions per Crude Throughput.....                                     | 10 |
| Figure S3. Process Diagram of a General U.S. Refinery.....                                                                                                                                | 11 |
| Figure S 4. Refinery Process Unit Emissions (Process, Combustion, and FWE-1) Allocation Factors to Unit Products (Including Still Gas), Aggregated Nationally.....                        | 24 |
| Figure S5. U.S. Refinery Process Unit Allocation Factors for Refinery Final Products, Aggregated Nationally, Following Reallocation of Emissions Attributed to Still Gas Production. .... | 24 |
| Figure S6. General Process of Lubricant Production. ....                                                                                                                                  | 24 |
| Figure S7. Emission Shares of Refinery Products to Total Refinery Emissions at National Level. ....                                                                                       | 25 |
| Figure S8. The Comparison of the Present Study GHG Emissions (Gasoline, Diesel/Distillate, and Jet/Kerosene Fuels in U.S. PADD Refineries in 2014) with Literature Results.....           | 28 |
| Figure S9. The Refinery Onsite CO <sub>2</sub> Emissions Allocated to Products, from Various Refinery Units.....                                                                          | 30 |
| Figure S 10. The Refinery Onsite CH <sub>4</sub> Emissions Allocated to Products, from Various Refinery Units.....                                                                        | 30 |
| Figure S11. The Refinery Onsite N <sub>2</sub> O Emissions Allocated to Products, from Various Refinery Units.....                                                                        | 31 |
| Figure S12. The Refinery Onsite VOC Emissions Allocated to Products, from Various Refinery Units.....                                                                                     | 31 |

|                                                                                                                                                                                        |    |
|----------------------------------------------------------------------------------------------------------------------------------------------------------------------------------------|----|
| Figure S13. The Refinery Onsite CO Emissions Allocated to Products, from Various Refinery Units.....                                                                                   | 32 |
| Figure S 14. The Refinery Onsite NO <sub>x</sub> Emissions Allocated to Products, from Various Refinery Units.....                                                                     | 32 |
| Figure S 15. The Refinery Onsite SO <sub>2</sub> Emissions Allocated to Products, from Various Refinery Units.....                                                                     | 33 |
| Figure S16. The Refinery Onsite PM <sub>10</sub> Emissions Allocated to Products, from Various Refinery Units.....                                                                     | 33 |
| Figure S17. The Refinery Onsite PM <sub>10</sub> Emissions Allocated to Products, from Various Refinery Units.....                                                                     | 34 |
|                                                                                                                                                                                        |    |
| Table S1. Count of Facilities Reporting Combustion Emissions by Fuel Type.....                                                                                                         | 3  |
| Table S2. Fuel Consumption at U.S. Refineries, 2014.....                                                                                                                               | 3  |
| Table S3. Adjusted Fuel Consumption at Refineries for NEI Emissions Dataset by PADD, 2014. ....                                                                                        | 4  |
| Table S4. U.S. Refinery Fuels Combustions GHG Emissions in 2014 (MT) .....                                                                                                             | 4  |
| Table S5. U.S. Refinery Fuels Combustions CAP Emissions in 2014 (kg).....                                                                                                              | 5  |
| Table S6. Emission Factors of Distillate Oil Combusted in U.S. Refineries in Various PADDs in 2014. ....                                                                               | 6  |
| Table S7. Emission Factors of Other Fuel Combusted in U.S. Refineries in Various PADDs in 2014. ....                                                                                   | 6  |
| Table S8. Emission Factors of Residual Oil Combusted in U.S. Refineries in Various PADDs in 2014. ....                                                                                 | 7  |
| Table S9. Emission Factors of LPG Fuel Combusted in U.S. Refineries in Various PADDs in 2014. ....                                                                                     | 7  |
| Table S10. Comparison of Catalyst Coke Emission Factors of the Present Study with Those of AP-42.....                                                                                  | 8  |
| Table S11. U.S. PADD Refinery Emissions per Crude Throughput for 2014. ....                                                                                                            | 8  |
| Table S12. U.S. PADD Refinery Shares in National Capacity for 2014.....                                                                                                                | 8  |
| Table S13. PADD-Level Refinery Unit Throughput (in Millions), 2014. ....                                                                                                               | 12 |
| Table S14. Refinery Unit Energy Intensity Estimates per Barrel of Utilized Charge Capacity....                                                                                         | 12 |
| Table S15. Refinery Process Unit Shares of Heaters and Boilers Energy Uses, Aggregated Nationally. ....                                                                                | 13 |
| Table S16. Calculated PADD Refineries Energy Uses (Heater, Boiler and Electricity) by Refinery Unit, in Billion MJ.....                                                                | 14 |
| Table S17. Comparison of Total Energy Consumption by PADD (billion MJ). ....                                                                                                           | 15 |
| Table S18. National Refinery Process Unit GHG and CAP emissions (MT/year) from 2014, after Allocations of Combustion Emissions and FWE-1. ....                                         | 15 |
| Table S19. U.S. Refineries National Aggregated GHG and CAP Unit Emissions Intensity (g/M <sup>3</sup> ), after Allocations of Combustion Emissions, Facility-wide Emissions FWE-1..... | 16 |

|                                                                                                                                                                                                                         |    |
|-------------------------------------------------------------------------------------------------------------------------------------------------------------------------------------------------------------------------|----|
| Table S20. National Refinery Process Unit GHG and CAP emissions (MT/year), after<br>Appropriate Allocations of Combustion Emissions and FWE-1, and after Refinery Still Gas<br>Burdens Allocation upon Iterations. .... | 18 |
| Table S21. Correspondence Between Refinery Products Across EIA and PRELIM. ....                                                                                                                                         | 19 |
| Table S22. EIA Reported Final Product Output at Refineries by PADD (Annual), 2014 .....                                                                                                                                 | 20 |
| Table S23. Comparison of Refinery Final Products Volume from PRELIM V1.1 and EIA Report<br>in 2014. ....                                                                                                                | 21 |
| Table S24. Refinery GHG and CAP Emissions per MJ of Refinery Final Products in Each<br>PADD. ....                                                                                                                       | 26 |
| Table S25. Refinery GHG and CAP Emissions per MJ of Refinery Final Products in Each<br>PADD, from Process, Combustion, and Facility-wide Sources. ....                                                                  | 28 |

## 1. Refinery Fuels Combustion Emission Factor

### 1.1 Refinery Fuels Consumption

**Table S1. Count of Facilities Reporting Combustion Emissions by Fuel Type.**

| Combustion Fuel                 | Facilities Reporting |            |
|---------------------------------|----------------------|------------|
|                                 | NEI                  | GHGRP      |
| Coal                            | 3 (2%)               | 1 (1%)     |
| Coke                            | 74 (58%)             | 93 (72%)   |
| Distillate                      | 89 (70%)             | 50 (39%)   |
| Liquefied petroleum gases (LPG) | 10 (8%)              | 3 (2%)     |
| Residual Oil                    | 29 (23%)             | 9 (7%)     |
| Natural Gas                     | 95 (74%)             | 113 (88%)  |
| Refinery Gas                    | 98 (77%)             | 124 (96%)  |
| Other                           | 32 (25%)             | 51 (40%)   |
| Any Combustion Type             | 123 (96%)            | 129 (100%) |
| Total Facility Count            | 128                  | 129        |

**Table S2. Fuel Consumption at U.S. Refineries, 2014.**

| EIA Fuel Type                   | Fuel Consumption | Unit                        | Fuel Consumption (mmBTU) | Percent of Total Consumption |
|---------------------------------|------------------|-----------------------------|--------------------------|------------------------------|
| Catalyst petcoke <sup>1</sup>   | 15,402,363,953   | kg                          | 457,552,791              | 17%                          |
| Coal                            | 14,514,956       | kg                          | 362,229                  | <0.1%                        |
| Distillate fuel oil             | 49,126           | m <sup>3</sup>              | 1,666,974                | 0.1%                         |
| Electricity, purchased          | 47,224,000,000   | kwh                         | 161,134,977              | 5.9%                         |
| Liquefied petroleum gases (LPG) | 366,455          | m <sup>3</sup>              | 8,223,762                | 0.3%                         |
| Marketable petcoke              | 115,393,899      | kg                          | 3,427,967                | 0.1%                         |
| Natural gas, fuel               | 20,025,588,959   | m <sup>3</sup>              | 695,174,651              | 25%                          |
| Other products <sup>2</sup>     | 183,307          | m <sup>3</sup>              | 5,767,654                | 0.2%                         |
| Residual fuel oil               | 65,660           | m <sup>3</sup>              | 2,434,482                | 0.1%                         |
| Steam, purchased                | 59,196,023,960   | kg                          | 156,538,544              | 5.7%                         |
| Still gas <sup>3</sup>          | 36,552,941       | m <sup>3</sup> fuel oil eq. | 1,241,669,179            | 45%                          |

<sup>1</sup> Petcoke is converted from volume to mass using the EIA conversion factor of 5 barrels per short tons.

<sup>2</sup> Other products includes pentanes plus, other hydrocarbons, oxygenates, hydrogen, unfinished oils, gasoline, special naphthas, jet fuel, lubricants, asphalt and road oil, and miscellaneous products.

<sup>3</sup> Still gas energy basis uses a LHV conversion of 128,950 btu/gal fuel oil eq. based on liquid still gas reported in GREET 2016. EIA reports HHV only for still gas as 142,857 btu/gal fuel oil eq.<sup>[16]</sup>.

**Table S3. Adjusted Fuel Consumption at Refineries for NEI Emissions Dataset by PADD, 2014.**

| EIA Fuel Type          | Adjusted Fuel Consumption (million MJ) |         |         |        |         |
|------------------------|----------------------------------------|---------|---------|--------|---------|
|                        | PADD 1                                 | PADD 2  | PADD 3  | PADD 4 | PADD 5  |
| Catalyst petcoke       | 45,766                                 | 95,610  | 253,348 | 16,533 | 68,690  |
| Coal                   | 382                                    | --      | --      | --     | --      |
| Distillate fuel oil    | --                                     | 188     | 989     |        | 562     |
| Electricity, purchased | 9,637                                  | 45,630  | 90,113  | 7,482  | 16,392  |
| LPG                    | --                                     | 5,067   | 1,583   | 86     | 1,869   |
| Marketable petcoke     | --                                     | --      | --      | 2,787  | 787     |
| Natural gas, fuel      | 40,736                                 | 116,039 | 428,212 | 15,937 | 127,554 |
| Other products         | 42                                     | 285     | 1,887   | --     | 3,744   |
| Residual fuel oil      | 19                                     | 143     | 174     | 80     | 2,082   |
| Steam, purchased       | 6,202                                  | 16,484  | 123,506 | 1,878  | 16,374  |
| Still gas              | 86,461                                 | 278,643 | 631,561 | 49,551 | 254,008 |

**Table S4. U.S. Refinery Fuels Combustions GHG Emissions in 2014 (MT).**

| Fuel                       | PADD 1    | PADD 2     | PADD 3     | PADD 4    | PADD 5     | U. S.       |
|----------------------------|-----------|------------|------------|-----------|------------|-------------|
| <b>CO<sub>2</sub> (MT)</b> |           |            |            |           |            |             |
| Coal                       | 53,960    | -          | -          | -         | -          | 53,960      |
| Distillate                 | 81,052    | 28,640     | 26,478     | 6,802     | 64,511     | 207,483     |
| LPG                        | -         | -          | -          | 17        | 37,508     | 37,524      |
| Residual Oil               | 391       | 4,298      | -          | 11,578    | 159,432    | 175,698     |
| Other                      | 4,043     | 13,156     | 37,784     | 2,598     | 215,241    | 272,821     |
| Coke                       | 4,492,413 | 9,550,592  | 22,292,446 | 1,644,402 | 7,416,416  | 45,396,268  |
| Combined gas               | 7,228,477 | 22,355,839 | 60,411,372 | 4,207,371 | 22,177,307 | 116,380,367 |
| <b>CH<sub>4</sub> (MT)</b> |           |            |            |           |            |             |
| Coal                       | 6.4       | -          | -          | -         | -          | 6.4         |
| Distillate                 | 3.3       | 1.2        | 1.1        | 0.3       | 2.6        | 8.4         |
| LPG                        | -         | -          | -          | -         | 1.7        | 1.7         |
| Residual Oil               | 0.0       | 0.2        | -          | 0.5       | 6.4        | 7.0         |
| Other                      | 0.1       | 0.7        | 29.6       | 0.0       | 9.6        | 40.0        |
| Coke                       | 167.1     | 292.9      | 679.1      | 57.7      | 213.3      | 1,410.1     |
| Combined gas               | 374.8     | 1,244.5    | 3,598.0    | 247.6     | 992.7      | 6,457.5     |
| <b>N<sub>2</sub>O (MT)</b> |           |            |            |           |            |             |
| Coal                       | 0.93      | -          | -          | -         | -          | 0.93        |
| Distillate                 | 0.66      | 0.23       | 0.22       | 0.06      | 0.52       | 1.68        |
| LPG                        | -         | -          | -          | -         | 0.35       | 0.35        |
| Residual Oil               | 0.00      | 0.03       | -          | 0.09      | 1.28       | 1.41        |
| Other                      | 0.02      | 0.15       | 5.94       | 0.01      | 1.91       | 8.02        |
| Coke                       | 30.84     | 59.54      | 134.63     | 10.15     | 43.04      | 278.19      |
| Combined gas               | 71.73     | 244.32     | 699.65     | 48.00     | 186.99     | 1,250.69    |

**Table S5. U.S. Refinery Fuels Combustions CAP Emissions in 2014 (kg).**

| <b>Fuel</b>                 | <b>PADD 1</b> | <b>PADD 2</b> | <b>PADD 3</b> | <b>PADD 4</b> | <b>PADD 5</b> | <b>U. S.</b> |
|-----------------------------|---------------|---------------|---------------|---------------|---------------|--------------|
| <b>VOC (kg)</b>             |               |               |               |               |               |              |
| Coal                        | 653           | 429           | 3,250         | -             | -             | 4,333        |
| Coke                        | 17,807        | 253,859       | 562,832       | 79,730        | 169,901       | 1,084,130    |
| Distillate                  | 27,763        | 33,402        | 111,309       | 10,625        | 8,806         | 191,905      |
| LPG                         | -             | 1,867         | 757           | -             | 1,573         | 4,197        |
| Other                       | 7,367         | 94,730        | 389,496       | 18,749        | 336,104       | 846,446      |
| Residual Oil                | 423           | 10,683        | 148,372       | 491           | 13,267        | 173,236      |
| Combined Gas                | 148,302       | 796,359       | 1,907,109     | 170,812       | 938,866       | 3,961,447    |
| <b>CO (kg)</b>              |               |               |               |               |               |              |
| Coal                        | 46,784        | 5,776         | 5             | -             | -             | 52,564       |
| Coke                        | 139,583       | 1,566,166     | 3,256,214     | 147,773       | 1,059,406     | 6,169,142    |
| Distillate                  | 74,225        | 83,228        | 199,532       | 51,267        | 26,915        | 435,167      |
| LPG                         | -             | 534           | 1,245         | -             | 6,076         | 7,855        |
| Other                       | 68,006        | 1,134,391     | 2,653,719     | 791,358       | 993,059       | 5,640,534    |
| Residual Oil                | 1,625         | 35,866        | 609,438       | 290           | 123,520       | 770,738      |
| Combined Gas                | 2,489,789     | 9,098,178     | 10,678,673    | 1,802,065     | 5,014,344     | 29,083,049   |
| <b>NO<sub>x</sub> (kg)</b>  |               |               |               |               |               |              |
| Coal                        | 134,336       | 626           | 39            | -             | -             | 135,001      |
| Coke                        | 931,172       | 1,716,169     | 2,580,207     | 229,947       | 519,231       | 5,976,726    |
| Distillate                  | 86,202        | 342,879       | 498,337       | 146,771       | 130,316       | 1,204,505    |
| LPG                         | -             | 263           | 1,481         | -             | 28,235        | 29,980       |
| Other                       | 142,983       | 1,447,820     | 5,024,883     | 298,085       | 1,853,680     | 8,767,450    |
| Residual Oil                | 1,240         | 57,977        | 934,448       | 694           | 242,806       | 1,237,165    |
| Combined Gas                | 4,071,115     | 13,439,312    | 25,592,406    | 2,455,940     | 9,730,526     | 55,289,299   |
| <b>SO<sub>2</sub> (kg)</b>  |               |               |               |               |               |              |
| Coal                        | 589,743       | 2,485         | 7             | -             | -             | 592,235      |
| Coke                        | 1,079,595     | 1,510,994     | 2,852,891     | 496,517       | 520,074       | 6,460,072    |
| Distillate                  | 2,044         | 9,571         | 40,625        | 70,457        | 32,744        | 155,440      |
| LPG                         | -             | 8             | 360           | -             | 171           | 538          |
| Other                       | 20,785        | 93,291        | 689,473       | 187,970       | 72,830        | 1,064,349    |
| Residual Oil                | 14            | 222           | 158,921       | 59            | 68,841        | 228,057      |
| Combined Gas                | 406,502       | 2,528,260     | 5,146,416     | 587,247       | 3,132,889     | 11,801,314   |
| <b>PM<sub>10</sub> (kg)</b> |               |               |               |               |               |              |
| Coal                        | 10,659        | 231           | 1             | -             | -             | 10,892       |
| Coke                        | 515,781       | 1,810,673     | 2,540,200     | 603,018       | 279,329       | 5,749,001    |
| Distillate                  | 7,767         | 39,783        | 37,542        | 26,091        | 8,338         | 119,521      |
| LPG                         | -             | 9             | 65            | -             | 1,350         | 1,424        |
| Other                       | 18,725        | 152,373       | 915,391       | 35,967        | 178,171       | 1,300,628    |
| Residual Oil                | 56            | 913           | 137,649       | 114           | 14,110        | 152,842      |
| Combined Gas                | 769,728       | 2,147,602     | 3,253,191     | 271,671       | 1,364,501     | 7,806,692    |

| <b>Fuel</b>                  | <b>PADD 1</b> | <b>PADD 2</b> | <b>PADD 3</b> | <b>PADD 4</b> | <b>PADD 5</b> | <b>U. S.</b> |
|------------------------------|---------------|---------------|---------------|---------------|---------------|--------------|
| <b>PM<sub>2.5</sub> (kg)</b> |               |               |               |               |               |              |
| Coal                         | 10,278        | 93            | 0             | 489,371       | -             | 10,372       |
| Coke                         | 477,178       | 1,638,704     | 2,295,442     | 10,560        | 228,336       | 5,129,030    |
| Distillate                   | 7,349         | 38,158        | 37,517        | -             | 7,041         | 100,624      |
| LPG                          | -             | 9             | 65            | 35,961        | 1,348         | 1,422        |
| Other                        | 15,531        | 152,359       | 906,425       | 114           | 176,466       | 1,286,742    |
| Residual Oil                 | 56            | 913           | 137,648       | 244,592       | 13,702        | 152,433      |
| Combined Gas                 | 652,368       | 2,000,415     | 3,189,008     | 69            | 1,336,410     | 7,422,793    |

## 1.2 Refinery Fuels Combustion Emission Factors

**Table S6. Emission Factors of Distillate Oil Combusted in U.S. Refineries in Various PADDs in 2014.**

| <b>Pollutant</b>  | <b>Distillate Emission Factor (g/MJ for CO<sub>2</sub> and mg/MJ for Other Pollutants)</b> |               |               |               |               |             |
|-------------------|--------------------------------------------------------------------------------------------|---------------|---------------|---------------|---------------|-------------|
|                   | <b>PADD 1</b>                                                                              | <b>PADD 2</b> | <b>PADD 3</b> | <b>PADD 4</b> | <b>PADD 5</b> | <b>U.S.</b> |
| CO <sub>2</sub>   | –                                                                                          | 152.5         | 27.5          | –             | 111.1         | 119.7       |
| CH <sub>4</sub>   | –                                                                                          | 6.2           | 1.1           | –             | 4.4           | 4.8         |
| N <sub>2</sub> O  | –                                                                                          | 1.2           | 0.2           | –             | 0.9           | 1.0         |
| VOC               | –                                                                                          | 178.1         | 112.5         | –             | 15.7          | 110.4       |
| CO                | –                                                                                          | 443.7         | 201.7         | –             | 47.9          | 250.3       |
| NO <sub>x</sub>   | –                                                                                          | 1,828.1       | 503.7         | –             | 232.0         | 692.8       |
| SO <sub>2</sub>   | –                                                                                          | 51.0          | 41.1          | –             | 58.3          | 89.4        |
| PM <sub>10</sub>  | –                                                                                          | 212.1         | 37.9          | –             | 14.8          | 68.7        |
| PM <sub>2.5</sub> | –                                                                                          | 203.4         | 37.9          | –             | 12.5          | 57.9        |

**Table S7. Emission Factors of Other Fuel Combusted in U.S. Refineries in Various PADDs in 2014.**

| Pollutant         | Other Fuel Emission Factor (g/MJ for CO <sub>2</sub> and mg/MJ for Other Pollutants) |        |        |        |        |       |
|-------------------|--------------------------------------------------------------------------------------|--------|--------|--------|--------|-------|
|                   | PADD 1                                                                               | PADD 2 | PADD 3 | PADD 4 | PADD 5 | U.S.  |
| CO <sub>2</sub>   | 95.8                                                                                 | 46.2   | 20.5   | –      | 55.6   | 45.2  |
| CH <sub>4</sub>   | 1.9                                                                                  | 2.6    | 16.1   | –      | 2.5    | 6.6   |
| N <sub>2</sub> O  | 0.4                                                                                  | 0.5    | 3.2    | –      | 0.5    | 1.3   |
| VOC               | 10.0                                                                                 | 37.5   | 78.6   | –      | 3.5    | 29.1  |
| CO                | 38.5                                                                                 | 126.0  | 322.9  | –      | 33.0   | 129.4 |
| NO <sub>x</sub>   | 29.4                                                                                 | 203.7  | 495.1  | –      | 64.9   | 207.6 |
| SO <sub>2</sub>   | 0.3                                                                                  | 0.8    | 84.2   | –      | 18.4   | 38.3  |
| PM <sub>10</sub>  | 1.3                                                                                  | 3.2    | 72.9   | –      | 3.8    | 25.7  |
| PM <sub>2.5</sub> | 1.3                                                                                  | 3.2    | 72.9   | –      | 3.7    | 25.6  |

**Table S8. Emission Factors of Residual Oil Combusted in U.S. Refineries in Various PADDs in 2014.**

| Pollutant         | Residual Oil Emission Factor (g/MJ for CO <sub>2</sub> and mg/MJ for Other Pollutants) |        |        |        |        |       |
|-------------------|----------------------------------------------------------------------------------------|--------|--------|--------|--------|-------|
|                   | PADD 1                                                                                 | PADD 2 | PADD 3 | PADD 4 | PADD 5 | U.S.  |
| CO <sub>2</sub>   | 20.9                                                                                   | 30.0   | –      | 143.2  | 74.1   | 68.5  |
| CH <sub>4</sub>   | 1.1                                                                                    | 1.2    | –      | 5.7    | 3.0    | 2.7   |
| N <sub>2</sub> O  | 0.1                                                                                    | 0.2    | –      | 1.2    | 0.6    | 0.5   |
| VOC               | 0.3                                                                                    | 2.5    | 78.0   | 0.1    | 11.6   | 15.2  |
| CO                | 8.1                                                                                    | 22.6   | 351.6  | 2.2    | 62.9   | 78.3  |
| NO <sub>x</sub>   | 88.6                                                                                   | 248.2  | 938.2  | 24.0   | 427.0  | 436.9 |
| SO <sub>2</sub>   | 1,183.7                                                                                | 457.5  | 56.5   | 3.0    | 429.6  | 397.1 |
| PM <sub>10</sub>  | 8,990.1                                                                                | 32.9   | 100.8  | 4.7    | 78.1   | 141.3 |
| PM <sub>2.5</sub> | 6,103.3                                                                                | 28.8   | 100.1  | 0.9    | 68.5   | 111.3 |

**Table S9. Emission Factors of LPG Fuel Combusted in U.S. Refineries in Various PADDs in 2014.**

| Pollutant         | LPG Emission Factor (g/MJ for CO <sub>2</sub> and mg/MJ for Other Pollutants) |        |        |        |        |      |
|-------------------|-------------------------------------------------------------------------------|--------|--------|--------|--------|------|
|                   | PADD 1                                                                        | PADD 2 | PADD 3 | PADD 4 | PADD 5 | U.S. |
| CO <sub>2</sub>   | –                                                                             | –      | –      | 0.2    | 19.4   | 4.3  |
| CH <sub>4</sub>   | –                                                                             | –      | –      | 0.2    | 19.4   | 4.3  |
| N <sub>2</sub> O  | –                                                                             | –      | –      | –      | 0.2    | 0.0  |
| VOC               | –                                                                             | 0.4    | 0.5    | –      | 0.8    | 0.5  |
| CO                | –                                                                             | 0.1    | 0.8    | –      | 3.3    | 0.9  |
| NO <sub>x</sub>   | –                                                                             | 0.1    | 0.9    | –      | 15.1   | 3.5  |
| SO <sub>2</sub>   | –                                                                             | 0.001  | 0.2    | –      | 0.1    | 0.1  |
| PM <sub>10</sub>  | –                                                                             | 0.002  | 0.0    | –      | 0.7    | 0.2  |
| PM <sub>2.5</sub> | –                                                                             | 0.002  | 0.0    | –      | 0.7    | 0.2  |



Emissions from coal combustion are reported in PADD 1, PADD 2, and PADD 3. However, coal consumption data is only reported in PADD 1. Thus, the coal combustion emission factor can only be derived based on a single facility in PADD 1. Using a single facility to generate emission factors for coal combustion is likely not representative. Emission factors from less common fuel types, such as LPG, are also more susceptible to reporting errors such as fuel mis-categorization at the facility. However, because fuel consumption data is only available at the PADD level, it is not possible to compare combustion emission factors across refineries. As a result, emission factors for both coal and LPG are less reliable than those of catalyst coke and combined gas (natural gas and refinery still gas). Note that PADD 4 and PADD 5 reported marketable pet coke consumption; however, the NEI database did not report corresponding combustion emissions. Thus, the emission factors for marketable pet coke cannot be derived.

**Table S10. Comparison of Catalyst Coke Emission Factors of the Present Study with Those of AP-42.**

| Pollutant<br>(kg/m <sup>3</sup> ) | Present<br>Study | AP42-uncontrolled |       |       | AP42-controlled |       |       |
|-----------------------------------|------------------|-------------------|-------|-------|-----------------|-------|-------|
|                                   |                  | Average           | Low   | High  | Average         | Low   | High  |
| VOC                               | 0.004            | NA                | NA    | NA    | NA              | NA    | NA    |
| CO                                | 0.023            | 39.2              | NA    | NA    | Neg             | NA    | NA    |
| NO <sub>x</sub>                   | 0.022            | 0.204             | 0.107 | 0.416 | 0.204           | 0.107 | 0.416 |
| SO <sub>2</sub>                   | 0.024            | 1.413             | 0.286 | 1.505 | 1.413           | 0.286 | 1.505 |
| PM <sub>10</sub>                  | 0.021            | 0.695             | 0.267 | 0.976 | 0.128           | 0.02  | 0.428 |
| PM <sub>2.5</sub>                 | 0.019            | NA                | NA    | NA    | NA              | NA    | NA    |

## 2. U.S. Refinery Emissions per Crude Throughput

**Table S11. U.S. PADD Refinery Emissions per Crude Throughput for 2014.**

| Pollutant                                        | PADD 1  | PADD 2  | PADD 3  | PADD 4  | PADD 5  | U.S.    |
|--------------------------------------------------|---------|---------|---------|---------|---------|---------|
| CO <sub>2</sub> (g/m <sup>3</sup> crude)         | 204,636 | 179,037 | 189,913 | 216,239 | 256,805 | 200,401 |
| CH <sub>4</sub> (g/m <sup>3</sup> crude)         | 15.79   | 30.74   | 30.94   | 66.12   | 30.19   | 31.0    |
| N <sub>2</sub> O (g/m <sup>3</sup> crude)        | 1.71    | 1.53    | 1.80    | 1.83    | 1.58    | 1.70    |
| GHG (g CO <sub>2,eq</sub> /m <sup>3</sup> crude) | 205,563 | 180,363 | 191,317 | 218,706 | 258,131 | 201,781 |
| CO <sub>2</sub> (g/MJcrude <sup>1</sup> )        | 5.66    | 4.95    | 5.25    | 5.98    | 7.11    | 5.54    |
| CH <sub>4</sub> (mg/MJ crude)                    | 0.44    | 0.85    | 0.86    | 1.83    | 0.84    | 0.86    |
| N <sub>2</sub> O (mg/MJ crude)                   | 0.05    | 0.04    | 0.05    | 0.05    | 0.04    | 0.05    |
| GHG (g CO <sub>2,eq</sub> /MJ crude)             | 5.69    | 4.99    | 5.29    | 6.05    | 7.14    | 5.58    |
| VOC (mg/MJ crude)                                | 1.03    | 1.83    | 1.67    | 3.51    | 2.02    | 1.78    |
| CO (mg/MJ crude)                                 | 1.42    | 1.93    | 1.26    | 2.86    | 1.63    | 1.53    |
| NO <sub>x</sub> (mg/MJ crude)                    | 2.42    | 2.49    | 2.06    | 3.05    | 2.77    | 2.32    |
| SO <sub>2</sub> (mg/MJ crude)                    | 1.00    | 1.13    | 0.72    | 2.17    | 1.11    | 0.94    |
| PM <sub>10</sub> (mg/MJ crude)                   | 0.70    | 0.77    | 0.53    | 1.25    | 0.62    | 0.63    |

| Pollutant                       | PADD 1 | PADD 2 | PADD 3 | PADD 4 | PADD 5 | U.S. |
|---------------------------------|--------|--------|--------|--------|--------|------|
| PM <sub>2.5</sub> (mg/MJ crude) | 0.61   | 0.65   | 0.47   | 0.73   | 0.56   | 0.55 |

1. The crude volume was converted to energy using 36,141 MJ/m<sup>3</sup> (129,670 btu/gal) lower heating value, from GREET 2016 [18].

**Table S12. U.S. PADD Refinery Shares in National Capacity for 2014.**

| Dataset | PADD 1 | PADD 2 | PADD 3 | PADD 4 | PADD 5 | U.S. |
|---------|--------|--------|--------|--------|--------|------|
| GHGRP   | 6.9%   | 22.0%  | 51.1%  | 3.6%   | 16.3%  | 100% |
| NEI     | 6.9%   | 21.8%  | 52.1%  | 3.5%   | 15.7%  | 100% |

Note that GHGRP and NEI are two independent data systems, and thus have slightly different facility coverage.

The U.S. averaged CAP emissions per national crude input can be itemized as the PADD contributions weighted by PADD refinery capacity (see Table S12). Figure S1 shows the U.S. weighted average CAP emissions per crude input.

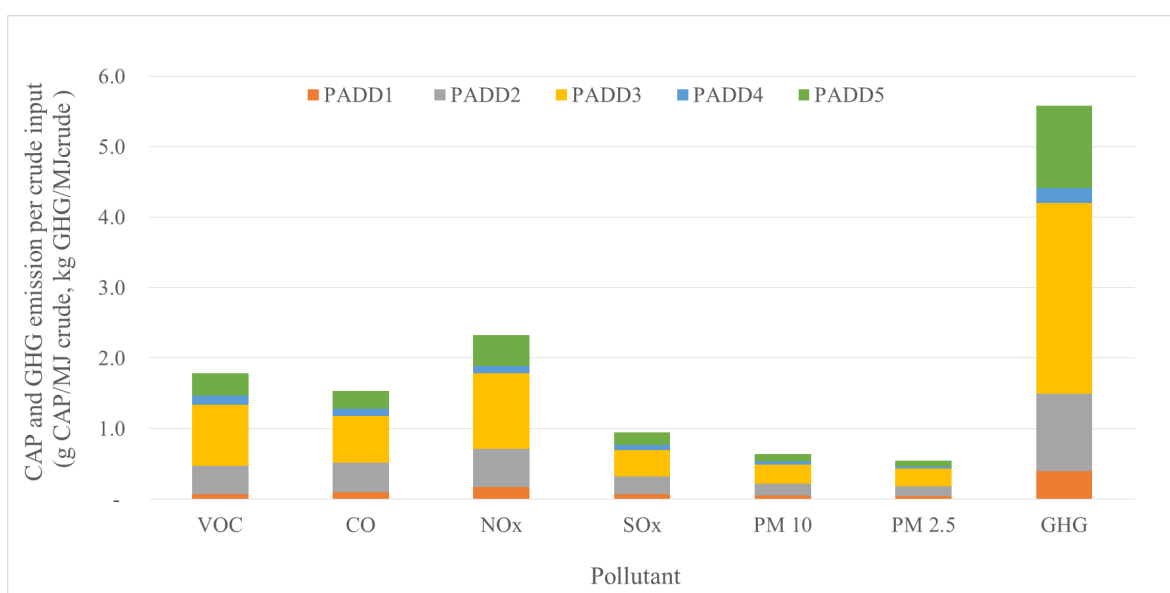

**Figure S1. U.S. Refinery CAP and GHG Emissions per MJ Crude Processed in 2014, with Capacity Weighted Contribution from Each PADD.**

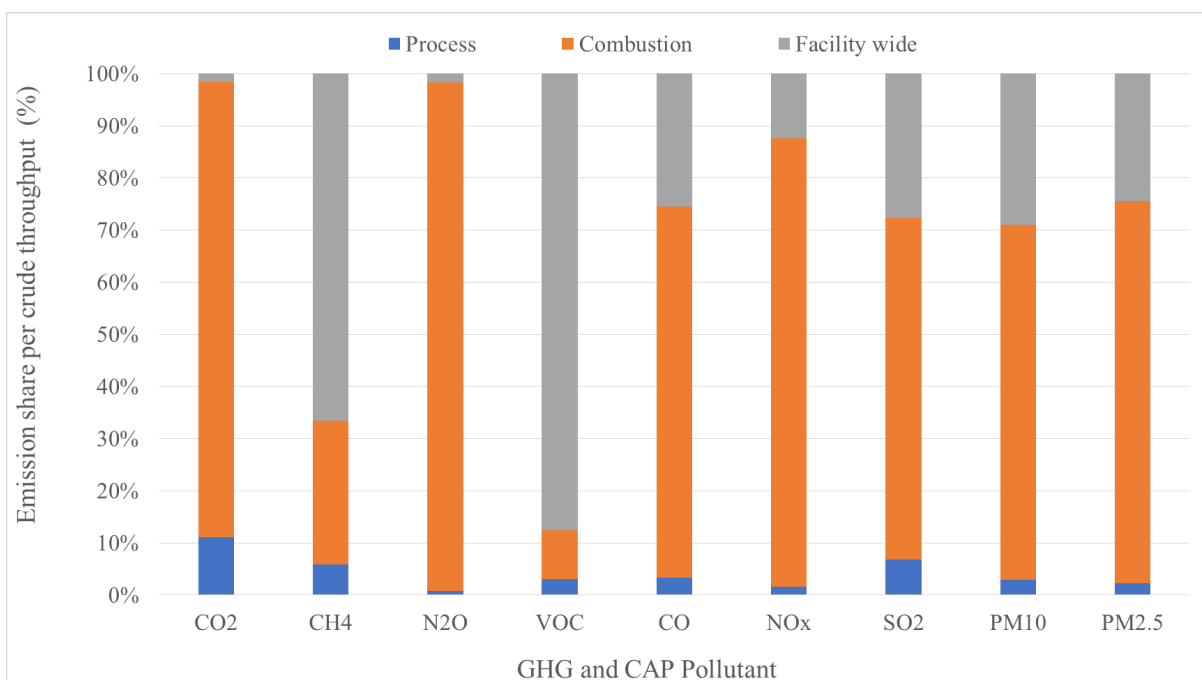

**Figure S2. Shares of Process Emissions, Combustion Emissions, and Facility-wide Emissions for U.S. Refinery Total Emissions per Crude Throughput.**

### 3. U.S. Refinery Process Unit Capacity and Energy Use

A typical refinery process diagram was created using previous research effort as a starting point.<sup>[8,9]</sup> The original process diagram was modified to reflect unit process designations to which emission factors are associated, and unit throughput capacity as reported in the EIA refinery capacity dataset.

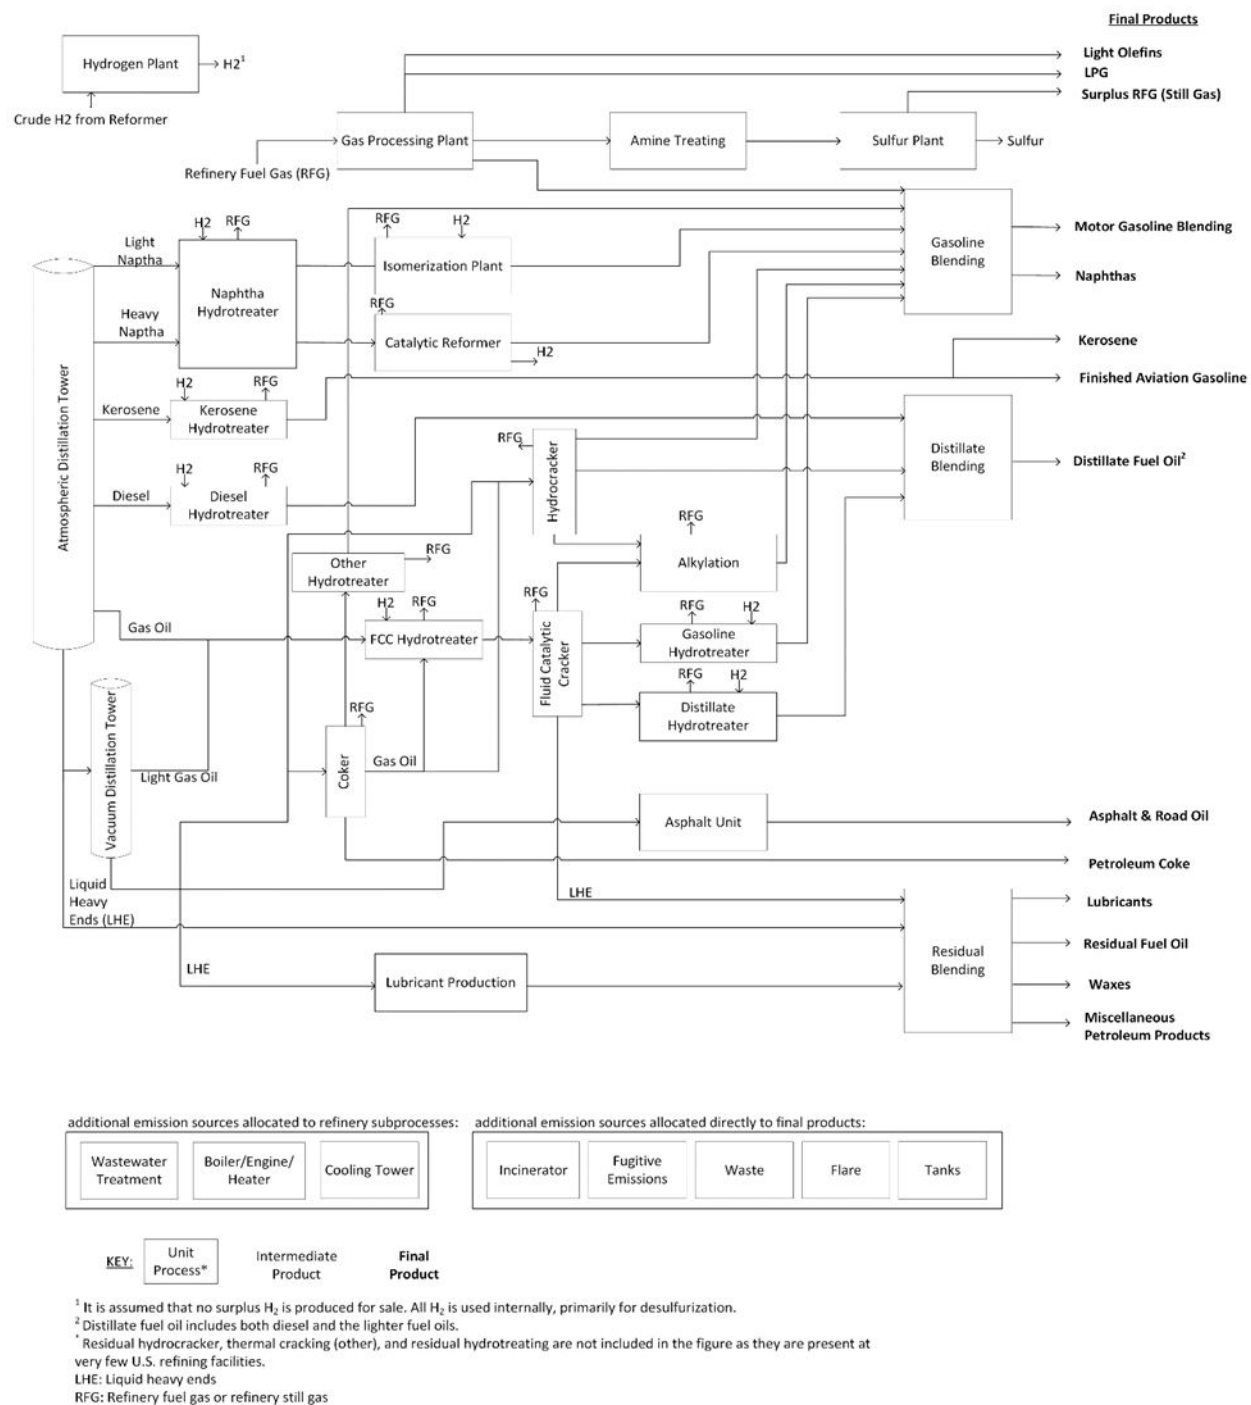

**Figure S3. Process Diagram of a General U.S. Refinery.**

**Table S13. PADD-Level Refinery Unit Throughput (in Millions), 2014.**

| Refinery Unit                  | Units                                      | Dataset <sup>2</sup> | PADD 1 | PADD 2 | PADD 3 | PADD 4 | PADD 5 | National |
|--------------------------------|--------------------------------------------|----------------------|--------|--------|--------|--------|--------|----------|
| Alkylation                     | m <sup>3</sup> alkylate product            | P                    | 4.0    | 14     | 32     | 2.3    | 12     | 64       |
| Asphalt Unit                   | m <sup>3</sup> asphalt and road oil        | P                    | 4.1    | 13     | 11     | 3.8    | 2.7    | 34       |
| Atmospheric Distillation Tower | m <sup>3</sup>                             | C                    | 64     | 200    | 490    | 33     | 150    | 940      |
| Catalytic Reformer             | m <sup>3</sup>                             | C                    | 12     | 45     | 91     | 6.2    | 27     | 180      |
| Coker                          | m <sup>3</sup>                             | C                    | 3.8    | 28     | 79     | 4.3    | 28     | 140      |
| Diesel Hydrotreater            | m <sup>3</sup>                             | C                    | 14     | 53     | 110    | 7.7    | 25     | 210      |
| Distillate Hydrotreater        | m <sup>3</sup>                             | C                    | 8.7    | 3.9    | 6.3    | 2.6    | 6.1    | 28       |
| Fluid Catalytic Cracker        | m <sup>3</sup>                             | C                    | 24     | 66     | 160    | 10     | 44     | 300      |
| Gas/Oil Hydrotreater           | m <sup>3</sup>                             | C                    | 0.31   | 33     | 73     | 4.9    | 36     | 150      |
| Gasoline Hydrotreater          | m <sup>3</sup>                             | C                    | 7.9    | 21     | 85     | 2.2    | 16     | 130      |
| Hydrocracker                   | m <sup>3</sup>                             | C                    | 2.1    | 17     | 60     | 1.5    | 28     | 110      |
| Hydrogen Plant                 | m <sup>3</sup> hydrogen gas at stp         | P                    | 600    | 4,800  | 9,400  | 1,600  | 11,000 | 28,000   |
| Isomerization Plant            | m <sup>3</sup> liquid isomers <sup>1</sup> | P                    | 1.3    | 8.1    | 17     | 0.82   | 9.8    | 37       |
| Kerosene Hydrotreater          | m <sup>3</sup>                             | C                    | 2.5    | 15     | 45     | 2.1    | 11     | 76       |
| Lubricant Production           | m <sup>3</sup> lubricants                  | P                    | 1.0    | 0.48   | 8.3    | -      | 1.9    | 12       |
| Naphtha Hydrotreater           | m <sup>3</sup>                             | C                    | 17     | 60     | 110    | 7.4    | 31     | 230      |
| Other Hydrotreater             | m <sup>3</sup>                             | C                    | -      | 2.2    | 11     | 0.75   | 3.0    | 17       |
| Residual Hydrotreater          | m <sup>3</sup>                             | C                    | -      | -      | 13     | -      | -      | 13       |
| Sulfur Plant                   | kg sulfur                                  | P                    | 310    | 2,400  | 7,100  | 280    | 1,700  | 12,000   |
| Thermal Cracking               | m <sup>3</sup>                             | C                    | -      | -      | 0.54   | -      | 0.72   | 1.3      |
| Vacuum Distillation            | m <sup>3</sup>                             | C                    | 28     | 87     | 240    | 12     | 80     | 450      |

<sup>1</sup> Isomers include isobutane, isopentane, isohexane, and isooctane.

<sup>2</sup> Unit throughputs are calculated from EIA datasets of charge capacity (C) or production capacity (P). Charge capacity represents the input capacity in liquid volume to the process unit. Production capacity represents product output from a process unit.

**Table S14. Refinery Unit Energy Intensity Estimates per Barrel of Utilized Charge Capacity.**

| Refinery Unit                              | Throughput (T <sub>U</sub> )<br>(million bbl) | Energy Use (MJ / bbl)*      |                              |                                    | Energy Use (billion MJ) |                     |             |
|--------------------------------------------|-----------------------------------------------|-----------------------------|------------------------------|------------------------------------|-------------------------|---------------------|-------------|
|                                            |                                               | Heat<br>(I <sub>U,h</sub> ) | Steam<br>(I <sub>U,b</sub> ) | Electricity<br>(I <sub>U,e</sub> ) | Heater                  | Boiler <sup>1</sup> | Electricity |
| Alkylation                                 | 401                                           | 0                           | 227                          | 0                                  | –                       | 113.5               | –           |
| Asphalt Unit <sup>2</sup>                  | 215                                           | 0                           | 0                            | 0                                  | –                       | –                   | –           |
| Atmospheric Tower                          | 5,932                                         | 96                          | 8                            | 3                                  | 571.2                   | 61.9                | 19.2        |
| Catalytic Reformer                         | 1,141                                         | 293                         | 38                           | 11                                 | 334.4                   | 54.1                | 12.3        |
| Coker, Delayed                             | 849                                           | 154                         | 4                            | 5                                  | 130.7                   | 4.4                 | 4.0         |
| Coker, Fluid <sup>2</sup>                  | 48                                            | 0                           | 0                            | 0                                  | –                       | –                   | –           |
| Diesel Hydrotreater                        | 1,339                                         | 126                         | 10                           | 14                                 | 168.9                   | 17.0                | 19.3        |
| Distillate Hydrotreater                    | 173                                           | 126                         | 10                           | 14                                 | 21.9                    | 2.2                 | 2.5         |
| Fluid Catalytic Cracker <sup>3</sup>       | 1,902                                         | 0                           | 0                            | 0                                  | –                       | –                   | –           |
| Gasoil Hydrotreater                        | 926                                           | 126                         | 10                           | 14                                 | 116.7                   | 11.7                | 13.3        |
| Gasoline Hydrotreater                      | 832                                           | 126                         | 10                           | 14                                 | 104.9                   | 10.5                | 12.0        |
| Hydrocracker (Distillate)                  | 212                                           | 157                         | 2                            | 20                                 | 33.3                    | 0.5                 | 4.2         |
| Hydrocracker (Gas Oil)                     | 433                                           | 139                         | 95                           | 47                                 | 60.2                    | 51.4                | 20.4        |
| Hydrocracker (Residual)                    | 35                                            | 157                         | 2                            | 20                                 | 5.5                     | 0.1                 | 0.7         |
| Isomerization Plant                        | 235                                           | 271                         | 0                            | 4                                  | 63.6                    | –                   | 0.8         |
| Kerosene Hydrotreater                      | 480                                           | 126                         | 10                           | 14                                 | 60.5                    | 6.1                 | 6.9         |
| Lubricant Production                       | 73                                            | 695                         | 695                          | 0                                  | 51.0                    | 63.8                | (0.0)       |
| Naphtha Hydrotreater                       | 1,438                                         | 126                         | 10                           | 14                                 | 181.3                   | 18.2                | 20.7        |
| Other Hydrotreater                         | 108                                           | 126                         | 10                           | 14                                 | 13.7                    | 1.4                 | 1.6         |
| Residual Hydrotreater                      | 79                                            | 126                         | 10                           | 14                                 | 10.0                    | 1.0                 | 1.1         |
| Thermal Cracking                           | 8                                             | 159                         | 4                            | 5                                  | 1.3                     | 0.0                 | 0.0         |
| Vacuum Distillation                        | 2,809                                         | 57                          | 7                            | 1                                  | 160.1                   | 24.6                | 2.8         |
| Hydrogen Plant <sup>4</sup> (mil kg)       | 2,479                                         | 154                         | -34                          | 1                                  | 382.5                   | (105.9)             | 2.4         |
| Sulfur Plant <sup>4</sup> (mil short tons) | 13                                            | 0                           | -1538                        | 1010                               | –                       | -24.9               | 13.1        |
| Total                                      |                                               |                             |                              |                                    | 2,473.1                 | 312.8               | 157.5       |

<sup>1</sup> Energy use at boiler accounts for an 80% boiler efficiency rating

<sup>2</sup> PRELIM shows zero heat intensity and steam intensity for asphalt unit.

<sup>3</sup> Fluid coking and the FCC are treated as self-sustained; no additional facility heat is supplied outside of catalyst coke combustion

<sup>4</sup> Hydrogen and sulfur energy use reported in MJ per kg and short ton, respectively

**Table S15. Refinery Process Unit Shares of Heaters and Boilers Energy Uses, Aggregated Nationally.**

| Refinery Unit                  | Heater | Boiler | Combined |
|--------------------------------|--------|--------|----------|
| Alkylation                     | -      | 26%    | 4.0%     |
| Asphalt Unit                   | -      | -      | -        |
| Atmospheric Distillation Tower | 23%    | 14%    | 23%      |
| Catalytic Reformer             | 14%    | 12%    | 14%      |
| Coker, Delayed                 | 5.3%   | 1.0%   | 4.8%     |
| Coker, Fluid                   | -      | -      | -        |
| Diesel Hydrotreater            | 6.8%   | 3.8%   | 6.6%     |
| Distillate Hydrotreater        | 0.9%   | 0.5%   | 0.9%     |
| Fluid Catalytic Cracker        | -      | -      | -        |
| Gas/Oil Hydrotreater           | 4.7%   | 2.6%   | 4.6%     |
| Gasoline Hydrotreater          | 4.2%   | 2.4%   | 4.1%     |
| Hydrocracker                   | 4.0%   | 12%    | 5.4%     |
| Isomerization Plant            | 2.6%   | -      | 2.3%     |
| Kerosene Hydrotreater          | 2.4%   | 1.4%   | 2.4%     |
| Lubricant Production           | 2.1%   | 14%    | 4.1%     |
| Naphtha Hydrotreater           | 7.3%   | 4.1%   | 7.1%     |
| Other Hydrotreater             | 0.6%   | 0.3%   | 0.5%     |
| Residual Hydrotreater          | 0.4%   | 0.2%   | 0.4%     |
| Thermal Cracking               | < 0.1% | < 0.1% | < 0.1%   |
| Vacuum Distillation            | 6.5%   | 5.8%   | 6.7%     |
| Hydrogen Plant                 | 15%    | -      | 9.8%     |
| Sulfur Plant                   | -      | -      | -        |

**Table S16. Calculated PADD Refineries Energy Uses (Heater, Boiler and Electricity) by Refinery Unit, in Billion MJ.**

| Refinery Unit                        | PADD 1 | PADD 2 | PADD 3 | PADD 4 | PADD 5 | National |
|--------------------------------------|--------|--------|--------|--------|--------|----------|
| Alkylation                           | 7.2    | 24.2   | 57.4   | 4.0    | 20.7   | 113.5    |
| Asphalt Unit <sup>1</sup>            | —      | —      | —      | —      | —      | —        |
| Atmospheric Tower                    | 44.6   | 141.8  | 338.0  | 22.9   | 105.1  | 652.4    |
| Catalytic Reformer                   | 27.0   | 99.8   | 201.0  | 13.7   | 59.3   | 400.9    |
| Coker, Delayed                       | 1.4    | 28.7   | 79.0   | 4.0    | 26.0   | 139.1    |
| Coker, Fluid <sup>2</sup>            | —      | —      | —      | —      | —      | —        |
| Diesel Hydrotreater                  | 13.1   | 51.3   | 109.4  | 7.4    | 24.0   | 205.1    |
| Distillate Hydrotreater              | 8.3    | 3.8    | 6.1    | 2.5    | 5.9    | 26.6     |
| Fluid Catalytic Cracker <sup>2</sup> | —      | —      | —      | —      | —      | —        |
| Gas/Oil Hydrotreater                 | 0.3    | 31.7   | 70.7   | 4.7    | 34.5   | 141.8    |
| Gasoline Hydrotreater                | 7.6    | 20.3   | 82.0   | 2.1    | 15.5   | 127.4    |
| Hydrocracker                         | 3.2    | 26.6   | 98.0   | 2.0    | 46.4   | 176.3    |
| Hydrogen Plant                       | 6.1    | 48.7   | 94.9   | 16.1   | 113.3  | 279.0    |
| Isomerization Plant                  | 2.2    | 14.1   | 29.8   | 1.4    | 17.0   | 64.4     |
| Kerosene Hydrotreater                | 2.4    | 14.8   | 43.6   | 2.0    | 10.6   | 73.5     |
| Lubricant Production                 | 10.2   | 4.8    | 81.4   | —      | 18.5   | 114.8    |
| Naphtha Hydrotreater                 | 16.1   | 58.0   | 108.6  | 7.2    | 30.3   | 220.2    |
| Other Hydrotreater                   | —      | 2.1    | 10.9   | 0.7    | 2.9    | 16.6     |
| Residual Hydrotreater                | —      | —      | 12.1   | —      | —      | 12.1     |
| Sulfur Plant                         | (0.3)  | (2.4)  | (7.1)  | (0.3)  | (1.7)  | (11.8)   |

| Refinery Unit       | PADD 1 | PADD 2 | PADD 3  | PADD 4 | PADD 5 | National |
|---------------------|--------|--------|---------|--------|--------|----------|
| Thermal Cracking    | –      | –      | 0.6     | –      | 0.8    | 1.3      |
| Vacuum Distillation | 12.1   | 37.2   | 102.0   | 5.0    | 33.9   | 190.2    |
| Total               | 161.4  | 605.5  | 1,518.2 | 95.6   | 562.9  | 2,943    |

<sup>1</sup> The asphalt unit energy use is neglected because PRELIM shows zero heat intensity and steam intensity.

<sup>2</sup> Fluid coking and the FCC are treated as self-sustained; no additional facility heat is supplied outside of catalyst coke combustion.

## Validating Energy Consumption at Refineries

The total energy use for a specific refinery unit is calculated from unit throughput and energy intensity (heater energy use, boiler energy use, and electricity use). This approach is validated by comparing results with national refinery energy consumption data. Although electricity use is not used to allocate emissions to process units, it is included here to better reflect the granularity of data provided in the EIA fuel consumption dataset:

$$E_U = (I_{U,h} + I_{U,b} + I_{U,e}) * T_U, \quad (1)$$

where  $E_U$  represents the total energy used for refinery unit  $U$ ;  $I$  represents the average energy intensity required from heaters, boilers, and other energy sources for each unit  $U$  (in MJ/bbl. unit throughput); and  $T$  represents the estimated unit throughput for each unit  $U$  at each facility.

Total energy use at refineries, estimated using this method, indicates that approximately 9% of energy embodied in incoming crude is consumed during the refining process (Table S2). Total energy use estimated by each process is compared with the fuel consumption reported by EIA (in Table S2), and shows approximately 2% difference at the national level, validating this estimation approach.

**Table S17. Comparison of Total Energy Consumption by PADD (billion MJ).**

| Refinery Input/Energy Use                  | PADD 1 | PADD 2 | PADD 3 | PADD 4 | PADD 5 | National |
|--------------------------------------------|--------|--------|--------|--------|--------|----------|
| Sum of Process Unit Energy Use             | 161    | 605    | 1,518  | 96     | 563    | 2,943    |
| Fuel Inputs by PADD (EIA <sup>[10]</sup> ) | 189    | 559    | 1,533  | 95     | 509    | 2,885    |
| Crude Input (EIA <sup>[20]</sup> )         | 2,330  | 7,406  | 17,658 | 1,197  | 5,486  | 34,085   |

## 4. Refinery Process Unit Emissions

**Table S18. National Refinery Process Unit GHG and CAP emissions (MT/year) from 2014, After Allocations of Combustion Emissions and FWE-1.**

| Process        | CO <sub>2</sub> | CH <sub>4</sub> | N <sub>2</sub> O | VOC | CO    | NO <sub>x</sub> | SO <sub>2</sub> | PM <sub>10</sub> | PM <sub>2.5</sub> |
|----------------|-----------------|-----------------|------------------|-----|-------|-----------------|-----------------|------------------|-------------------|
| Alkylation     | 4,807,119       | 268             | 52               | 608 | 1,913 | 4,221           | 709             | 900              | 737               |
| Amine Treating | –               | –               | –                | 27  | 76    | 47              | 40              | 2.5              | 2.5               |
| Asphalt Unit   | 111,233         | 277             | –                | 0.2 | –     | –               | –               | –                | –                 |



| Process                        | CO <sub>2</sub> | CH <sub>4</sub> | N <sub>2</sub> O | VOC    | CO     | NO <sub>x</sub> | SO <sub>2</sub> | PM <sub>10</sub> | PM <sub>2.5</sub> |
|--------------------------------|-----------------|-----------------|------------------|--------|--------|-----------------|-----------------|------------------|-------------------|
| Atmospheric Distillation Tower | 27,954,360      | 1,539           | 297              | 2,961  | 7,964  | 15,035          | 3,132           | 3,036            | 2,634             |
| Catalytic Reformer             | 16,601,577      | 1,068           | 181              | 1,792  | 5,058  | 9,539           | 1,881           | 1,881            | 1,635             |
| Coker                          | 7,074,309       | 1,611           | 74               | 1,152  | 1,800  | 3,319           | 1,101           | 869              | 654               |
| Diesel Hydrotreater            | 7,795,436       | 446             | 87               | 812    | 2,341  | 4,186           | 876             | 826              | 694               |
| Distillate Hydrotreater        | 1,073,568       | 57              | 11               | 157    | 528    | 532             | 55              | 181              | 167               |
| Fluid Catalytic Cracker        | 45,396,268      | 1,410           | 278              | 1,294  | 7,924  | 8,204           | 7,598           | 6,231            | 5,525             |
| Gas Processing Plant           | –               | –               | –                | –      | –      | –               | –               | –                | –                 |
| Gas/Oil Hydrotreater           | 5,145,969       | 278             | 54               | 596    | 1,163  | 2,458           | 517             | 586              | 528               |
| Gasoline Blending              | –               | –               | –                | 47     | –      | –               | –               | –                | –                 |
| Gasoline Hydrotreater          | 5,285,833       | 301             | 58               | 552    | 1,291  | 2,709           | 636             | 579              | 522               |
| Hydrocracker                   | 5,752,065       | 337             | 66               | 620    | 1,340  | 3,319           | 669             | 554              | 473               |
| Hydrogen Plant                 | 26,893,022      | 541             | 105              | 1,231  | 2,736  | 6,276           | 1,468           | 1,281            | 1,122             |
| Isomerization Plant            | 2,524,132       | 136             | 26               | 236    | 628    | 1,279           | 223             | 233              | 217               |
| Kerosene Hydrotreater          | 3,061,967       | 166             | 32               | 243    | 555    | 1,384           | 314             | 286              | 264               |
| Lubricant Production           | 4,025,718       | 205             | 38               | 614    | 866    | 1,610           | 785             | 287              | 270               |
| Naphtha Hydrotreater           | 8,580,882       | 478             | 93               | 915    | 2,414  | 4,714           | 892             | 926              | 802               |
| Other Hydrotreater             | 662,398         | 37              | 7.1              | 65     | 182    | 360             | 79              | 58               | 54                |
| Residual Hydrotreater          | 438,356         | 31              | 6.2              | 24     | 40     | 144             | 11              | 38               | 29                |
| Sulfur Plant                   | 2,470,964       | 14              | 0.8              | 265    | 1,037  | 386             | 1,796           | 168              | 159               |
| Thermal Cracking               | 50,840          | 2.5             | 0.5              | 12     | 26     | 67              | 47              | 81               | 54                |
| Vacuum Distillation            | 7,944,110       | 441             | 86               | 1,036  | 1,970  | 4,325           | 969             | 867              | 751               |
| Total                          | 183,650,126     | 9,643           | 1,553            | 15,257 | 41,851 | 74,112          | 23,799          | 19,869           | 17,295            |

**Table S19. U.S. Refineries National Aggregated GHG and CAP Unit Emissions Intensity (g/M<sup>3</sup>), After Allocations of Combustion Emissions, Facility-wide Emissions FWE-1.**

| Process                        | Unit             | VOC | CO   | NO <sub>x</sub> | SO <sub>2</sub> | PM <sub>10</sub> | PM <sub>2.5</sub> | CO <sub>2</sub> | CH <sub>4</sub> | N <sub>2</sub> O |
|--------------------------------|------------------|-----|------|-----------------|-----------------|------------------|-------------------|-----------------|-----------------|------------------|
| Alkylation                     | g/m <sup>3</sup> | 9.5 | 30.0 | 66.2            | 11.1            | 14.1             | 11.6              | 77,792          | 4.3             | 0.8              |
| Asphalt Unit                   | g/m <sup>3</sup> | 0.0 | 0.0  | 0.0             | 0.0             | 0.0              | 0.0               | 3,278           | 8.2             | 0.0              |
| Atmospheric Distillation Tower | g/m <sup>3</sup> | 3.2 | 8.5  | 16.0            | 3.3             | 3.2              | 2.8               | 30,049          | 1.7             | 0.3              |

| Process                 | Unit             | VOC  | CO   | NO <sub>x</sub> | SO <sub>2</sub> | PM <sub>10</sub> | PM <sub>2.5</sub> | CO <sub>2</sub> | CH <sub>4</sub> | N <sub>2</sub> O |
|-------------------------|------------------|------|------|-----------------|-----------------|------------------|-------------------|-----------------|-----------------|------------------|
| Catalytic Reformer      | g/m <sup>3</sup> | 9.9  | 27.9 | 52.7            | 10.4            | 10.4             | 9.0               | 92,647          | 6.0             | 1.0              |
| Coker (Delayed)         | g/m <sup>3</sup> | 8.1  | 12.6 | 23.3            | 7.7             | 6.1              | 4.6               | 50,133          | 11.4            | 0.5              |
| Diesel Hydrotreater     | g/m <sup>3</sup> | 3.8  | 11.0 | 19.7            | 4.1             | 3.9              | 3.3               | 37,233          | 2.1             | 0.4              |
| Distillate Hydrotreater | g/m <sup>3</sup> | 5.7  | 19.1 | 19.3            | 2.0             | 6.6              | 6.1               | 38,937          | 2.1             | 0.4              |
| Fluid Catalytic Cracker | g/m <sup>3</sup> | 4.3  | 26.2 | 27.1            | 25.1            | 20.6             | 18.3              | 153,135         | 4.8             | 0.9              |
| Gas/Oil Hydrotreater    | g/m <sup>3</sup> | 4.0  | 7.9  | 16.7            | 3.5             | 4.0              | 3.6               | 34,960          | 1.9             | 0.4              |
| Gasoline Hydrotreater   | g/m <sup>3</sup> | 4.2  | 9.8  | 20.5            | 4.8             | 4.4              | 3.9               | 41,178          | 2.3             | 0.5              |
| Hydrocracker            | g/m <sup>3</sup> | 5.9  | 12.7 | 31.4            | 6.3             | 5.2              | 4.5               | 55,515          | 3.3             | 0.6              |
| Hydrogen Plant          | g/m <sup>3</sup> | 0.0  | 0.1  | 0.2             | 0.1             | 0.0              | 0.0               | 977             | 0.0             | 0.0              |
| Isomerization Plant     | g/m <sup>3</sup> | 6.3  | 16.8 | 34.3            | 6.0             | 6.2              | 5.8               | 67,868          | 3.7             | 0.7              |
| Kerosene Hydrotreater   | g/m <sup>3</sup> | 3.2  | 7.3  | 18.1            | 4.1             | 3.7              | 3.5               | 40,132          | 2.2             | 0.4              |
| Lubricant Production    | g/m <sup>3</sup> | 62.1 | 87.5 | 162.8           | 79.4            | 29.1             | 27.3              | 398,315         | 20.3            | 3.8              |
| Naphtha Hydrotreater    | g/m <sup>3</sup> | 4.0  | 10.6 | 20.6            | 3.9             | 4.1              | 3.5               | 37,927          | 2.1             | 0.4              |
| Other Hydrotreater      | g/m <sup>3</sup> | 3.8  | 10.7 | 21.2            | 4.7             | 3.4              | 3.1               | 38,899          | 2.2             | 0.4              |
| Residual Hydrotreater   | g/m <sup>3</sup> | 1.9  | 3.1  | 11.4            | 0.9             | 3.0              | 2.3               | 34,755          | 2.5             | 0.5              |
| Sulfur Plant            | g/kg             | 0.0  | 0.1  | 0.0             | 0.2             | 0.0              | 0.0               | 212             | 0.0             | 0.0              |
| Thermal Cracking        | g/m <sup>3</sup> | 9.2  | 20.5 | 52.8            | 37.3            | 64.0             | 42.4              | 40,185          | 2.0             | 0.4              |
| Vacuum Distillation     | g/m <sup>3</sup> | 2.3  | 4.4  | 9.7             | 2.2             | 2.0              | 1.7               | 18,009          | 1.0             | 0.2              |

**Table S20. National Refinery Process Unit GHG and CAP emissions (MT/year), After Appropriate Allocations of Combustion Emissions and FWE-1, and After Refinery Still Gas Burdens Allocation upon Iterations.**

| Process after Still Gas Allocation | CO <sub>2</sub> | CH <sub>4</sub> | N <sub>2</sub> O | VOC   | CO    | NO <sub>x</sub> | SO <sub>2</sub> | PM <sub>10</sub> | PM <sub>2.5</sub> |
|------------------------------------|-----------------|-----------------|------------------|-------|-------|-----------------|-----------------|------------------|-------------------|
| Alkylation                         | 4,879,541       | 271             | 53               | 615   | 1,934 | 4,248           | 729             | 907              | 743               |
| Amine Treating                     | –               | –               | –                | 22    | 62    | 38              | 32              | 2                | 2                 |
| Asphalt Unit                       | 111,233         | 277             | –                | 0     | –     | –               | –               | –                | –                 |
| Atmospheric Distillation Tower     | 28,150,985      | 1,548           | 298              | 2,979 | 8,026 | 15,075          | 3,220           | 3,055            | 2,651             |
| Catalytic Reformer                 | 16,552,596      | 1,062           | 180              | 1,785 | 5,043 | 9,463           | 1,916           | 1,873            | 1,629             |
| Coker                              | 7,025,828       | 1,584           | 74               | 1,140 | 1,789 | 3,288           | 1,104           | 861              | 649               |
| Diesel Hydrotreater                | 7,911,172       | 452             | 88               | 824   | 2,376 | 4,229           | 908             | 838              | 705               |
| Distillate Hydrotreater            | 1,088,354       | 58              | 11               | 158   | 533   | 537             | 59              | 182              | 168               |
| Fluid Catalytic Cracker            | 45,138,823      | 1,402           | 277              | 1,286 | 7,879 | 8,158           | 7,556           | 6,196            | 5,494             |
| Gas Processing Plant               | –               | –               | –                | –     | –     | –               | –               | –                | –                 |
| Gas/Oil Hydrotreater               | 5,214,742       | 281             | 54               | 603   | 1,183 | 2,483           | 539             | 593              | 534               |
| Gasoline Blending                  | –               | –               | –                | 47    | –     | –               | –               | –                | –                 |

| <b>Process after Still Gas Allocation</b> | <b>CO<sub>2</sub></b> | <b>CH<sub>4</sub></b> | <b>N<sub>2</sub>O</b> | <b>VOC</b> | <b>CO</b> | <b>NO<sub>x</sub></b> | <b>SO<sub>2</sub></b> | <b>PM<sub>10</sub></b> | <b>PM<sub>2.5</sub></b> |
|-------------------------------------------|-----------------------|-----------------------|-----------------------|------------|-----------|-----------------------|-----------------------|------------------------|-------------------------|
| Gasoline Hydrotreater                     | 5,285,448             | 301                   | 58                    | 552        | 1,294     | 2,698                 | 646                   | 578                    | 521                     |
| Hydrocracker                              | 5,834,737             | 341                   | 66                    | 628        | 1,363     | 3,346                 | 692                   | 562                    | 480                     |
| Hydrogen Plant                            | 26,932,750            | 547                   | 105                   | 1,242      | 2,770     | 6,310                 | 1,516                 | 1,292                  | 1,131                   |
| Isomerization Plant                       | 2,559,561             | 138                   | 26                    | 239        | 638       | 1,292                 | 234                   | 236                    | 220                     |
| Kerosene Hydrotreater                     | 3,103,696             | 168                   | 32                    | 247        | 567       | 1,400                 | 326                   | 290                    | 268                     |
| Lubricant Production                      | 4,101,338             | 209                   | 39                    | 620        | 886       | 1,636                 | 802                   | 294                    | 276                     |
| Naphtha Hydrotreater                      | 8,586,894             | 478                   | 92                    | 915        | 2,418     | 4,696                 | 914                   | 926                    | 802                     |
| Other Hydrotreater                        | 668,015               | 37                    | 7                     | 65         | 184       | 362                   | 81                    | 59                     | 54                      |
| Residual Hydrotreater                     | 445,631               | 32                    | 6                     | 24         | 41        | 146                   | 13                    | 38                     | 30                      |
| Sulfur Plant                              | 2,020,409             | 12                    | 1                     | 217        | 851       | 316                   | 1,476                 | 137                    | 130                     |
| Thermal Cracking                          | 50,679                | 3                     | 0                     | 12         | 26        | 66                    | 47                    | 80                     | 53                      |
| Vacuum Distillation                       | 7,987,693             | 443                   | 86                    | 1,038      | 1,987     | 4,328                 | 991                   | 871                    | 755                     |
| Total                                     | 183,649,628           | 9,643                 | 1,553                 | 15,257     | 41,851    | 74,112                | 23,799                | 19,869                 | 17,295                  |

## 5. U.S. Refinery Final Products

Products reported by EIA are matched to product categories in PRELIM V1.1. Some important variations, shown in Table S21, are discussed here.

- EIA reports gasoline products as either “finished motor gasoline” or “motor gasoline blending components,” based on whether or not the blending takes place within the refinery gate. In the present study, the two categories are grouped as motor gasoline blending components or blendstock (BOB), because they are produced from the same pathways. The volume of ethanol included in finished motor gasoline, estimated at 65 vol% for the “Greater than Ed55” pool and 10 vol% for all other finished motor gasoline pools, is excluded from the grouped gasoline BOB pool.
- EIA reports liquefied refinery gas, including both C2-C4 paraffins and C2-C4 olefins, while PRELIM V1.1 categorizes propane and butane as LPG and light olefins (ethylene and propylene) as petrochemical (PC) feedstock. In contrast, in the EIA report, PC feedstock refers to naphtha with a boiling point less than 401°F. In the present study, to avoid the potential confusion of using the term “PC feedstock,” the term “light olefins” was used to refer to ethylene and propylene, and LPG includes propane and butane. EIA reports a negative production amount of isobutane, isobutene, and isobutylene, implying they are input (e.g., purchased to feed the alkylation unit), and thus not accounted for as refinery final product. In PRELIM, refinery still gas, LPG, and light olefins are produced at the top of many refinery units and are then sent to a gas plant, amine plant, and sulfur plant to remove sulfur and other impurities.
- In the EIA report, the petrochemical feedstock refers to “naphtha for petrochemical feedstock use” and “other oils for petrochemical feedstock use.” This is different from the

petrochemical feedstock term used in PRELIM, which refers to ethylene and propylene. The definition of PC feedstock might be related to whether steam cracking, which cracks refinery naphtha to ethylene and propylene, is within or beyond the refinery boundary. If it is within, ethylene and propylene will be regarded as PC feedstock; if it is beyond the boundary, naphtha will be regarded as the PC feedstock.

Thus, the present study uses the term “light olefins” to present ethylene and propylene, and the generic stream “naphtha” to include the EIA products of both “naphtha for petrochemical feedstock use” and “other oils for petrochemical feedstock use.” The EIA product “special naphtha” is also grouped into the current study’s naphtha product. PRELIM does not specify the production of naphtha, but the naphtha range products are included in the Jet-A/AVTUR category.

**Table S21. Correspondence Between Refinery Products Across EIA and PRELIM.**

| <b>Product Category (the present study)</b>           | <b>PRELIM Product</b>    | <b>EIA Product</b>                                                      |
|-------------------------------------------------------|--------------------------|-------------------------------------------------------------------------|
| Asphalt                                               | Asphalt                  | Asphalt and Road Oil                                                    |
| Diesel/Distillate                                     | ULSD <sup>1</sup>        | Distillate Fuel Oil, 0 to 15 ppm Sulfur                                 |
| Diesel/Distillate                                     | ULSD <sup>1</sup>        | Distillate Fuel Oil, Greater than 15 to 500 ppm Sulfur                  |
| Diesel/Distillate                                     | ULSD                     | Distillate Fuel Oil, Greater than 500 ppm Sulfur                        |
| Diesel/Distillate                                     | Liquid Heavy Ends        | -                                                                       |
| Gasoline Blending Components (BOB) <sup>2</sup>       | Blended Gasoline         | Motor Gasoline, Finished, Conventional, Ed55 and Lower                  |
| Gasoline Blending Components (BOB) <sup>2</sup>       | Blended Gasoline         | Motor Gasoline, Finished, Conventional, Greater Than Ed55               |
| Motor Gasoline Blending Components (BOB) <sup>2</sup> | Blended Gasoline         | Other Conventional Motor Gasoline                                       |
| Motor Gasoline Blending Components (BOB) <sup>2</sup> | Blended Gasoline         | Reformulated Motor Gasoline with Fuel Alcohol                           |
| Motor Gasoline Blending Components (BOB) <sup>2</sup> | Blended Gasoline         | Motor Gasoline Blending Components                                      |
| Aviation Gasoline                                     | Jet-A/AVTUR <sup>3</sup> | Aviation Gasoline                                                       |
| Jet/Kerosene                                          | Jet-A/AVTUR <sup>3</sup> | Commercial Kerosene-Type Jet Fuel                                       |
| Jet/Kerosene                                          | Jet-A/AVTUR <sup>3</sup> | Kerosene                                                                |
| Jet/Kerosene                                          | Jet-A/AVTUR <sup>3</sup> | Military Kerosene-Type Jet Fuel                                         |
| Naphtha                                               | Jet-A/AVTUR <sup>3</sup> | Special Naphthas                                                        |
| Naphtha                                               | Jet-A/AVTUR <sup>3</sup> | Naphtha For Petrochemical Feedstock Use                                 |
| Naphtha                                               | Jet-A/AVTUR <sup>3</sup> | Other Oils for Petrochemical Feedstock Use                              |
| Light olefins                                         | PC Feedstock             | Ethylene                                                                |
| Light olefins                                         | PC Feedstock             | Propylene                                                               |
| LPG or Liquefied Refinery Gas                         | LPG                      | Ethane                                                                  |
| LPG                                                   | LPG                      | Propane                                                                 |
| LPG                                                   | LPG                      | Normal Butane                                                           |
| Not Final Product                                     | LPG                      | Isobutane (negative amount in 2014, not accounted in the final product) |
| Not Final Product                                     | NA                       | Isobutylene (negative amount in 2014, not product)                      |
| Not Final Product                                     | NA                       | Normal Butylene (negative amount in 2014, not final product)            |
| Lubricants                                            | Liquid Heavy Ends        | Naphthenic Lubricants                                                   |
| Lubricants                                            | Liquid Heavy Ends        | Paraffinic Lubricants                                                   |

| <b>Product Category (the present study)</b>             | <b>PRELIM Product</b> | <b>EIA Product</b>                               |
|---------------------------------------------------------|-----------------------|--------------------------------------------------|
| Miscellaneous Petroleum Products                        | Liquid Heavy Ends     | Miscellaneous Petroleum Products for Fuel Use    |
| Miscellaneous Petroleum Products                        | Liquid Heavy Ends     | Miscellaneous Petroleum Products for Nonfuel Use |
| Residual Fuel Oil                                       | Liquid Heavy Ends     | Residual Fuel Oil, 0.31 to 1.00% Sulfur          |
| Residual Fuel Oil                                       | Liquid Heavy Ends     | Residual Fuel Oil, Greater than 1.00% Sulfur     |
| Residual Fuel Oil                                       | Liquid Heavy Ends     | Residual Fuel Oil, Less than 0.31% Sulfur        |
| Waxes                                                   | Liquid Heavy Ends     | Waxes                                            |
| Petroleum Coke, Catalyst (combusted, not final product) | Catalyst Coke         | Petroleum Coke, Catalyst                         |
| Petroleum Coke                                          | Coke                  | Petroleum Coke, Marketable                       |
| Still Gas (not final product)                           | Surplus RFG           | Still Gas                                        |

<sup>1</sup> ULSD = ultra-low sulfur diesel.

<sup>2</sup> PRELIM produced finished gasoline are converted to gasoline BOB by extracting ethanol amount.

<sup>3</sup> AVTUR = aviation turbine fuel.

## 6. Comparison of PRELIM Derived Products with EIA Reported Products

Table S22 shows national product output from the EIA report at refineries, and Table S23 shows the comparison of EIA products volume with the PRELIM modeling derived volumes.

**Table S22. EIA Reported Final Product Output at Refineries by PADD (Annual), 2014**

| <b>Product</b>                                  | <b>Unit</b>                    | <b>PADD1</b> | <b>PADD2</b> | <b>PADD3</b> | <b>PADD4</b> | <b>PADD5</b> | <b>U.S.</b> |
|-------------------------------------------------|--------------------------------|--------------|--------------|--------------|--------------|--------------|-------------|
| Motor Gasoline Blending Components <sup>1</sup> | 10 <sup>3</sup> m <sup>3</sup> | 31,740       | 107,269      | 228,270      | 16,098       | 72,297       | 455,674     |
| Distillate Fuel Oil                             | 10 <sup>3</sup> m <sup>3</sup> | 19,389       | 63,033       | 157,705      | 11,261       | 33,337       | 284,725     |
| Kerosene                                        | 10 <sup>3</sup> m <sup>3</sup> | 5,689        | 13,436       | 45,522       | 1,725        | 24,841       | 91,213      |
| Finished Aviation Gasoline                      | 10 <sup>3</sup> m <sup>3</sup> | –            | 109          | 488          | 13           | 104          | 714         |
| Special Naphtha <sup>2</sup>                    | 10 <sup>3</sup> m <sup>3</sup> | 37           | 73           | 2,266        | –            | 66           | 2,442       |
| Liquefied Refinery Gases (or LPG)               | 10 <sup>3</sup> m <sup>3</sup> | 2,314        | 6,869        | 24,646       | 608          | 3,479        | 37,916      |
| Lubricants                                      | 10 <sup>3</sup> m <sup>3</sup> | 749          | 462          | 7,274        | –            | 1,161        | 9,647       |
| Miscellaneous Petroleum Products <sup>3</sup>   | 10 <sup>3</sup> m <sup>3</sup> | 179          | 834          | 3,106        | 198          | 756          | 5,073       |
| Residual Fuel Oil                               | 10 <sup>3</sup> m <sup>3</sup> | 3,240        | 3,000        | 10,867       | 690          | 7,425        | 25,221      |
| Waxes                                           | 10 <sup>3</sup> m <sup>3</sup> | 11           | 64           | 336          | –            | –            | 411         |
| Petrochemical Feedstocks <sup>4</sup>           | 10 <sup>3</sup> m <sup>3</sup> | 187          | 1,819        | 16,107       | –            | 11           | 18,125      |
| Petroleum Coke                                  | MT                             | 693          | 8,518        | 24,834       | 1,018        | 7,657        | 42,720      |
| Asphalt and Road Oil                            | 10 <sup>3</sup> m <sup>3</sup> | 2,927        | 8,203        | 4,278        | 1,936        | 1,203        | 18,548      |
| Still Gas <sup>5</sup>                          | m <sup>3</sup> fuel oil eq.    | 2,348        | 7,514        | 21,876       | 1,364        | 7,094        | 40,196      |

<sup>1</sup> An estimate of ethanol content has been excluded from the finished motor gasoline pool prior to combining with gasoline blend. See explanation in text.

<sup>2</sup> All finished products within the naphtha boiling range that are used as paint thinners, cleaners, or solvents. These products are refined to a specified flash point. Special naphthas include all commercial hexane and cleaning solvents conforming to ASTM Specification D1836 and D484, respectively. Naphthas to be blended or marketed as motor gasoline or aviation gasoline, or those that are to be used as petrochemical and synthetic natural gas (SNG) feedstocks, are excluded.

<sup>3</sup> “Includes all finished products not classified elsewhere (e.g., petrolatum, lube refining byproducts (aromatic extracts and tars), absorption oils, ram-jet fuel, petroleum rocket fuels, synthetic natural gas feedstocks, and specialty oils)” (U.S. EIA<sup>[46]</sup>).

<sup>4</sup> “Chemical feedstocks derived from petroleum principally for the manufacture of chemicals, synthetic rubber, and a variety of plastics. The categories reported are “Naphtha Less than 401°F” and “Other Oils Equal to or Greater than 401°F” (U.S. EIA<sup>[16]</sup>).

<sup>5</sup> Refinery still gas is listed as final product, but is actually mostly consumed inside refineries.

**Table S23. Comparison of Refinery Final Products Volume from PRELIM V1.1 and EIA Report in 2014.**

| Refinery Final Product                              | PRELIM V1.1 Estimate | EIA <sup>[16]</sup> | Volume Difference |
|-----------------------------------------------------|----------------------|---------------------|-------------------|
| Gasoline BOB (m <sup>3</sup> )                      | 450,802,395          | 449,700,635         | 0.2%              |
| Diesel/Distillate (m <sup>3</sup> )                 | 294,965,568          | 280,598,467         | 5.1%              |
| Jet/Kerosene (m <sup>3</sup> )                      | 89,663,636           | 90,021,921          | -0.4%             |
| Aviation Gasoline (m <sup>3</sup> )                 | 691,463              | 701,085             | -1.4%             |
| Naphtha (m <sup>3</sup> )                           | 20,188,259           | 20,085,515          | 0.5%              |
| LPG (m <sup>3</sup> )                               | 27,053,545           | 22,120,294          | 22.3%             |
| Lubricants (m <sup>3</sup> )                        | 9,276,610            | 9,456,682           | -1.9%             |
| Miscellaneous Petroleum Products (m <sup>3</sup> )  | 6,197,781            | 4,991,526           | 24.2%             |
| Residual Fuel Oil (m <sup>3</sup> )                 | 24,651,068           | 24,936,919          | -1.1%             |
| Waxes (m <sup>3</sup> )                             | 440,444              | 402,660             | 9.4%              |
| Light olefins (m <sup>3</sup> )                     | 13,984,043           | 15,150,883          | -7.7%             |
| Petroleum Coke <sup>1</sup> (kg)                    | 26,094,334           | 30,401,951          | -14.2%            |
| Asphalt and Road Oil <sup>2</sup> (m <sup>3</sup> ) | 17,578,568           | 18,435,842          | -4.7%             |
| Total <sup>a</sup> (m <sup>3</sup> )                | 981,587,714          | 967,004,381         | 1.5%              |

<sup>1</sup> The conversion factor for petroleum coke is 5.0 bbl per short ton, based on EIA Petroleum and Other Liquids, Definitions, Sources and Explanatory Notes ([https://www.eia.gov/dnav/pet/TblDefs/pet\\_pnp\\_refp2\\_tbldef2.asp](https://www.eia.gov/dnav/pet/TblDefs/pet_pnp_refp2_tbldef2.asp)).

<sup>2</sup> The conversion factor for asphalt is 5.5 bbl per short ton, based on EIA Petroleum and Other Liquids, Definitions, Sources and Explanatory Notes ([https://www.eia.gov/dnav/pet/TblDefs/pet\\_pnp\\_refp2\\_tbldef2.asp](https://www.eia.gov/dnav/pet/TblDefs/pet_pnp_refp2_tbldef2.asp)).

For the major refinery products, such as gasoline BOB, diesel, and jet/kerosene, the model-derived product volumes match the EIA-reported volumes very well with 0.2%, 5.1%, and -0.4% differences, respectively. Some other products show higher degrees of deviation. These differences may be due to several factors:

- PRELIM V1.1 features a series of typical refinery configurations. However, it does not represent actual U.S. individual refinery configurations or operations. Fitting a U.S. individual refinery with PRELIM default configurations without modification leads to differences between the modeled products and the actual refinery products.

For example, in our study, fitting an individual U.S. refinery with existing PRELIM V1.1 models led to an underestimation of the capacity in the vacuum distillation, FCC, coker, and alkylation units, and an overestimation of the catalytic reformer, isomerization, and hydrotreating units.<sup>[S1]</sup> The presence of specific refinery processes affects total energy use and final product slate. The underestimation of coker unit capacity might be related to the underestimated production of petroleum coke.

- PRELIM V1.1 does not “customize” the refinery operations for individual crude slates; instead, it applies general correlations or calculations <sup>[10,24]</sup> (e.g., for the properties of

intermediate products). In contrast, “real world” refineries optimize operations responsive to refinery configurations as well as crude slates. These different approaches might cause differences in operations, in unit product slates, and therefore in final product slates.

- The largest degrees of deviation between PRELIM V1.1 product amount and the EIA-reported product amounts are observed for LPG and olefins. PRELIM V1.1, calculated the production of these two refinery products using a number of simplifications and assumptions.

Light products (refinery still gas, LPG, and light olefins) are often produced from the top of many refinery units. They are then sent to gas plants, amine plants, and sulfur plants to remove sulfur and other impurities (see Figure S3). In contrast to the major refinery products (gasoline BOB, diesel/distillate, jet/kerosene, etc.), which have relatively constant yields from refinery units, the yields of light products can vary significantly with refinery configuration, unit operations, and crude quality. PRELIM V1.1 splits still gas, LPG, and olefins yield with fixed ratios in the refinery modules, which might differ from individual refinery practice. In particular, PRELIM points out that the assumption of fuel gas production amount and composition can have noticeable impacts on energy uses and GHG emissions.<sup>[10,24]</sup>

## **7. U.S. Refinery Unit Emission Allocations to Products**

Upon establishing the correspondence between PRELIM-derived products and EIA final products, the allocation factors of refinery process units to refinery products can be developed in PRELIM V1.1. These factors are calculated for each refinery facility and aggregated at the PADD or national level based on a production weighted average. The PADD and national unit allocation factors derived from PRELIM V1.1 need some adjustments to better reflect U.S. refinery production.

### ***Splitting Factors***

While a single PRELIM V1.1 final product (e.g., Jet-A/AVTUR) is matched to multiple EIA products, further allocation (splitting) is required to complete the allocation to EIA final products.

Splitting factors are developed for each PADD and are calculated as the PADD-level production ratio of the EIA final products to which a given PRELIM V1.1 final product category is matched. For example, emissions allocated to the PRELIM V1.1 product category Jet-A/AVTUR are split between EIA products: finished aviation gasoline, kerosene, and naphtha, based on the relative production volume of these fuel groups reported by EIA. Naphtha includes EIA products “naphtha for petrochemical feedstock use,” “other oils for petrochemical feedstock use,” and special naphtha. Using this approach, the three refinery products, finished aviation gasoline, kerosene, and naphtha will have similar emissions burdens per unit of energy in each product without differentiating between their production pathways. For some other products, such as light products, liquid heavy ends used in PRELIM V1.1 were further split to match the more diverse EIA product slates.

### Refinery Still Gas

In the present study, all still gas is assumed to be consumed on site for heat generation within the refinery. Therefore, emissions allocated to still gas in PRELIM V1.1 are reallocated to refinery process units according to the relative heat and steam demand of each process unit within each PADD. These emissions are allocated again to unit final products based on their energy content. This iterative process continues until the results converge (the emissions remaining in the still gas pool are less than 0.00001% of total emissions for each flow) and the emissions attributed to individual unit products are obtained. In the present study, the calculation process required four iterations to attain convergence.

Figures S4 and S5 show the allocation factors of refinery unit emissions to unit products, before and after the emission burdens to refinery still gas are reallocated.

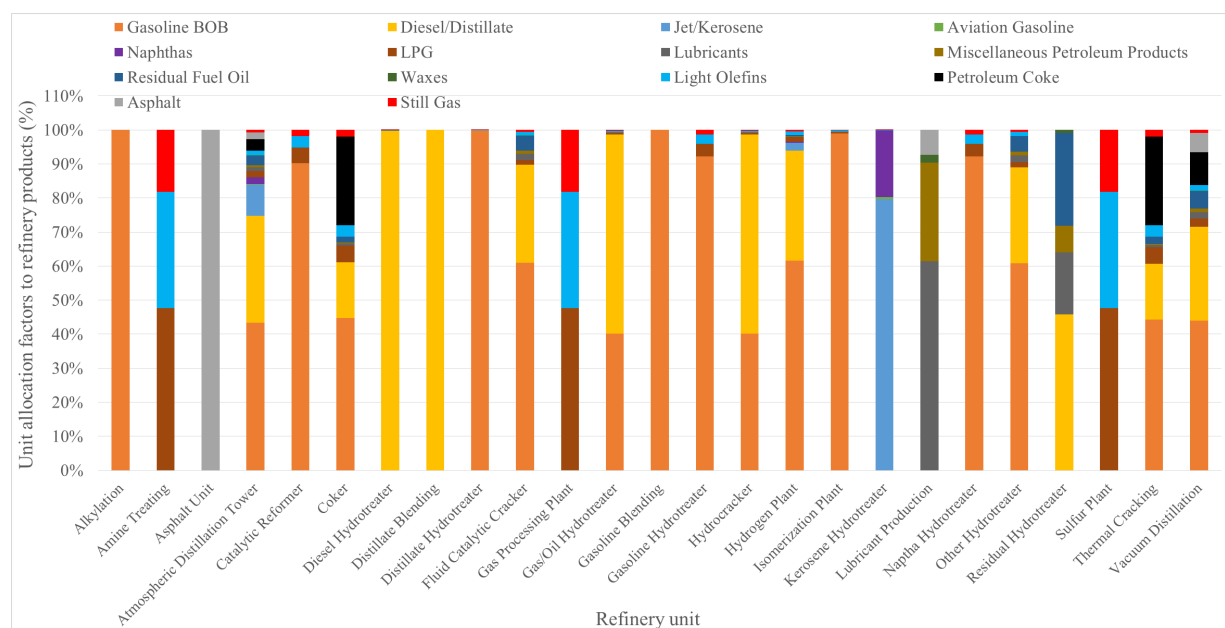

**Figure S4. Refinery Process Unit Emissions (Process, Combustion, and FWE-1) Allocation Factors to Unit Products (Including Still Gas), Aggregated Nationally.**



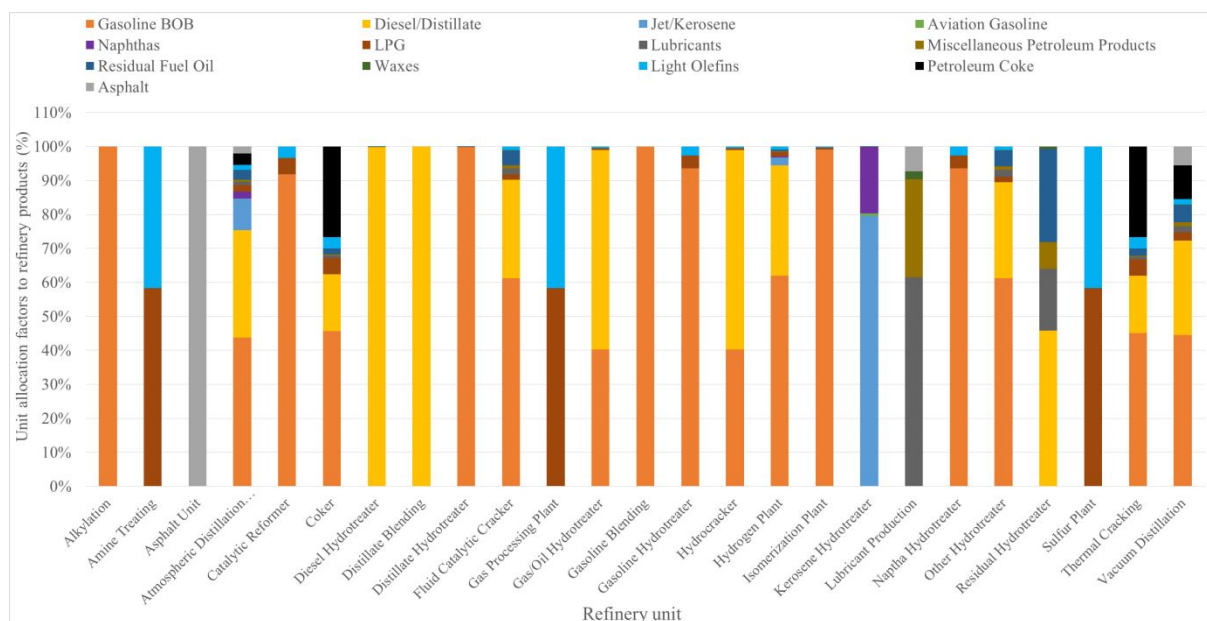

**Figure S5. U.S. Refinery Process Unit Allocation Factors for Refinery Final Products, Aggregated Nationally, Following Reallocation of Emissions Attributed to Still Gas Production.**

### ***Lubricant Production***

Lubricant production includes several complex and energy-intensive (thus emission-intensive) processes converts crude heavy cuts.<sup>[27,29]</sup> Each process will coproduce some other refinery products,<sup>[27,29]</sup> as illustrated in Figure S6.

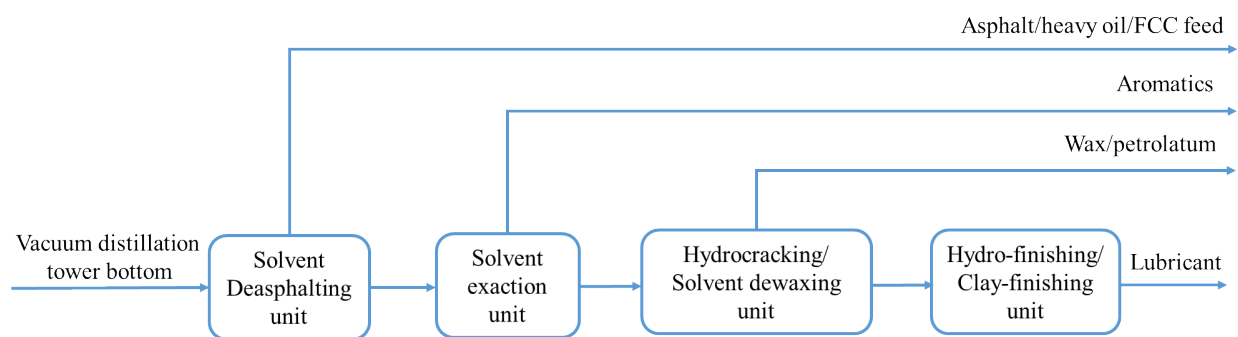

**Figure S6. General Process of Lubricant Production.**

The types of coproducts from the lubricant production process depend on individual refinery configurations and process technologies. For example, solvent-extracted asphalt/heavy oil can be blended with asphalt, blended with heavy oil, or used as feedstock to an FCC unit.<sup>[29]</sup> For dewaxing, hydrocracking technology breaks down wax, whereas solvent dewaxing separates wax and coproduces wax. Wax can be fed to the FCC or sold after appropriate treatment. Asphalt can be coproduced from deasphalting unit, but is produced in greater quantity by a separate dedicated asphalt unit, and thus the asphalt reported by the EIA is not mainly associated with lubricant production. These variations in refinery, technology, and categorization, along with the absence of mass/energy flow information among these units, make sub-process-level (solvent de-asphalting,

solvent exaction, hydrocracking/dewaxing, finishing) allocation infeasible. Thus, the present study treats the overall lubricant production as a “black box unit.” The burdens are split among the products by volume (because they are not energy products). To allocate the lubricant process burdens, one key element is determining the appropriate amount of asphalt product as coproduct of lubricant production, because most asphalts are more often produced from asphalt units. This asphalt coproduced with lubricant is estimated by summing up the asphalt products in the refinery facilities that also have lubricant product. Compared to the total amount of asphalt product in each region, the estimated share of asphalt coproduced with lubricant production is about 18.0%, 6.2%, 7.6%, 0%, and 9.3% for PADDs 1 through 5, respectively. The national average in the United States is about 7.6%.

With this estimated amount of coproduced asphalt, the lubricant production burdens can be allocated to both main product and coproducts. The lubricant unit allocation factors vary from PADD to PADD, and the national level is about 58.3%, 30.6%, 8.6%, and 2.5% for lubricant, aromatics/tar (miscellaneous product), asphalt, and wax, respectively.

## 8. Emissions of Refinery Final Products

Adding up the unit emissions attributed to refinery products and the FWE-2 attributed to refinery products produces the total emissions attributable to each refinery product. The emissions allocated to each refinery product pool varies, and the shares of total facility emissions are shown emissions are shown in Figure S7.

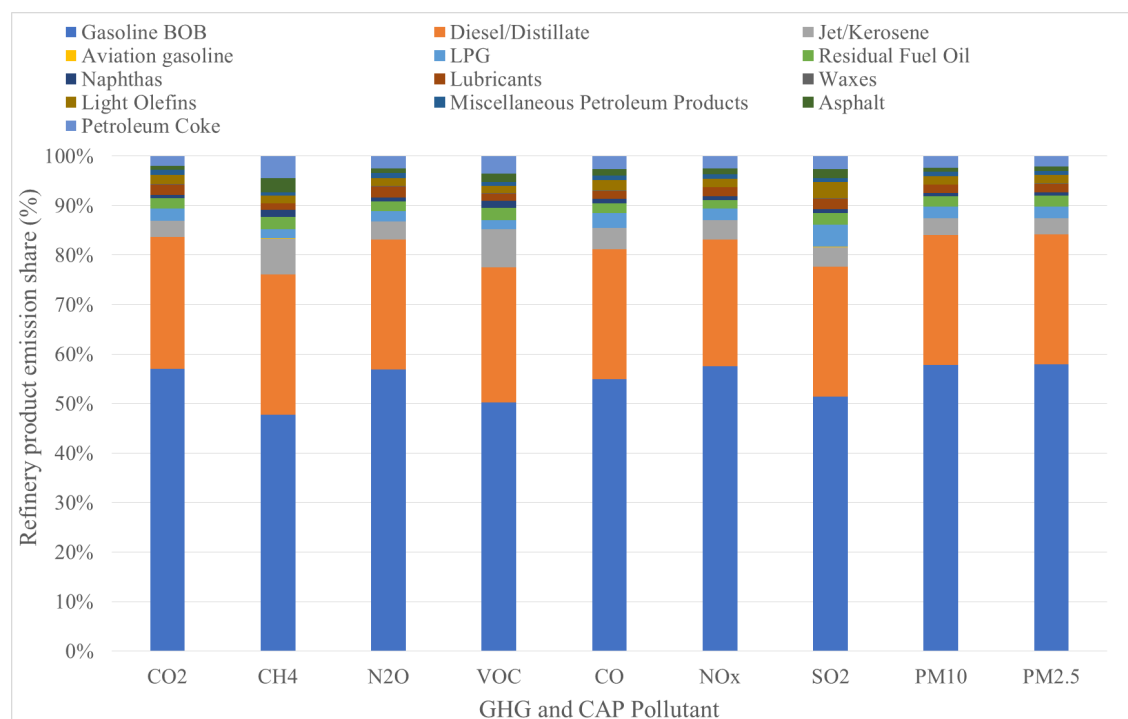

**Figure S7. Emission Shares of Refinery Products to Total Refinery Emissions at National Level.**

The emissions associated with refinery products vary among PADDs, and the final results are shown in Table S24 below.

**Table S24. Refinery GHG and CAP Emissions per MJ of Refinery Final Products in Each PADD.**

| Final Product     | CO <sub>2</sub> | CH <sub>4</sub> | N <sub>2</sub> O | VOC   | CO    | NO <sub>x</sub> | SO <sub>2</sub> | PM <sub>10</sub> | PM <sub>2.5</sub> |
|-------------------|-----------------|-----------------|------------------|-------|-------|-----------------|-----------------|------------------|-------------------|
| Unit              | g/MJ            | mg/MJ           | mg/MJ            | mg/MJ | mg/MJ | mg/MJ           | mg/MJ           | mg/MJ            | mg/MJ             |
| <b>PADD 1</b>     |                 |                 |                  |       |       |                 |                 |                  |                   |
| LPG               | 8.2             | 0.69            | 0.07             | 0.95  | 3.89  | 2.63            | 1.20            | 0.83             | 0.72              |
| Gasoline BOB      | 7.9             | 0.55            | 0.07             | 1.29  | 2.04  | 3.50            | 1.12            | 1.11             | 0.96              |
| Aviation gasoline | 0.0             | 0.00            | 0.00             | 0.00  | 0.00  | 0.00            | 0.00            | 0.00             | 0.00              |
| Diesel/distillate | 4.5             | 0.37            | 0.04             | 0.88  | 0.92  | 1.66            | 0.68            | 0.50             | 0.43              |
| Jet/kerosene      | 1.5             | 0.20            | 0.01             | 0.66  | 0.29  | 0.55            | 0.12            | 0.13             | 0.11              |
| Residual Fuel Oil | 3.4             | 0.39            | 0.03             | 1.02  | 0.94  | 1.46            | 0.66            | 0.48             | 0.42              |
| Petroleum Coke    | 8.8             | 0.56            | 0.07             | 0.74  | 0.46  | 0.83            | 0.16            | 0.58             | 0.51              |
| Asphalt           | 3.1             | 0.34            | 0.03             | 0.90  | 0.94  | 2.13            | 1.81            | 0.29             | 0.26              |
| Light Olefins     | 8.2             | 0.72            | 0.07             | 1.06  | 3.93  | 2.66            | 1.22            | 0.83             | 0.72              |
| Naphtha           | 1.5             | 0.19            | 0.01             | 0.54  | 0.29  | 0.55            | 0.12            | 0.12             | 0.11              |
| Lubricants        | 13.4            | 0.88            | 0.13             | 1.27  | 4.02  | 10.29           | 11.46           | 1.02             | 0.95              |
| Miscellaneous     | 13.4            | 0.86            | 0.13             | 1.19  | 4.00  | 10.27           | 11.45           | 1.02             | 0.95              |
| Waxes             | 13.4            | 0.86            | 0.13             | 1.20  | 4.00  | 10.28           | 11.45           | 1.02             | 0.95              |
| <b>PADD 2</b>     |                 |                 |                  |       |       |                 |                 |                  |                   |
| LPG               | 7.2             | 0.83            | 0.05             | 1.96  | 2.78  | 3.45            | 2.77            | 0.91             | 0.76              |
| Gasoline BOB      | 6.9             | 1.01            | 0.06             | 2.30  | 2.61  | 3.45            | 1.40            | 1.09             | 0.92              |
| Aviation gasoline | 1.7             | 0.48            | 0.02             | 0.91  | 0.82  | 1.05            | 0.50            | 0.25             | 0.22              |
| Diesel/distillate | 4.2             | 0.77            | 0.04             | 1.59  | 1.61  | 2.03            | 0.99            | 0.65             | 0.56              |
| Jet/kerosene      | 1.7             | 0.48            | 0.02             | 1.01  | 0.82  | 1.05            | 0.50            | 0.25             | 0.22              |
| Residual Fuel Oil | 3.1             | 0.64            | 0.03             | 1.42  | 1.07  | 1.22            | 0.84            | 0.59             | 0.51              |
| Petroleum Coke    | 2.9             | 1.17            | 0.03             | 2.32  | 1.38  | 1.97            | 1.02            | 0.61             | 0.39              |
| Asphalt           | 1.8             | 0.93            | 0.02             | 1.31  | 1.00  | 1.12            | 0.63            | 0.28             | 0.23              |
| Light Olefins     | 7.2             | 0.77            | 0.05             | 1.85  | 2.76  | 3.44            | 2.73            | 0.91             | 0.76              |
| Naphtha           | 1.6             | 0.46            | 0.02             | 0.87  | 0.81  | 1.04            | 0.48            | 0.25             | 0.22              |
| Lubricants        | 6.1             | 0.81            | 0.05             | 2.13  | 3.60  | 3.15            | 1.01            | 0.96             | 0.71              |
| Miscellaneous     | 6.1             | 0.76            | 0.05             | 2.03  | 3.57  | 3.14            | 0.97            | 0.96             | 0.71              |
| Waxes             | 6.1             | 0.76            | 0.05             | 2.04  | 3.57  | 3.14            | 0.97            | 0.96             | 0.71              |
| <b>PADD 3</b>     |                 |                 |                  |       |       |                 |                 |                  |                   |
| LPG               | 7.2             | 0.86            | 0.05             | 1.65  | 2.09  | 2.47            | 1.62            | 0.67             | 0.62              |
| Gasoline BOB      | 6.5             | 0.88            | 0.06             | 1.76  | 1.46  | 2.57            | 0.82            | 0.66             | 0.60              |
| Aviation gasoline | 2.1             | 0.72            | 0.02             | 1.49  | 0.69  | 1.00            | 0.39            | 0.21             | 0.19              |
| Diesel/distillate | 4.4             | 0.80            | 0.04             | 1.55  | 1.09  | 1.73            | 0.62            | 0.44             | 0.40              |

| <b>Final Product</b> | <b>CO<sub>2</sub></b> | <b>CH<sub>4</sub></b> | <b>N<sub>2</sub>O</b> | <b>VOC</b>   | <b>CO</b>    | <b>NO<sub>x</sub></b> | <b>SO<sub>2</sub></b> | <b>PM<sub>10</sub></b> | <b>PM<sub>2.5</sub></b> |
|----------------------|-----------------------|-----------------------|-----------------------|--------------|--------------|-----------------------|-----------------------|------------------------|-------------------------|
| <b>Unit</b>          | <b>g/MJ</b>           | <b>mg/MJ</b>          | <b>mg/MJ</b>          | <b>mg/MJ</b> | <b>mg/MJ</b> | <b>mg/MJ</b>          | <b>mg/MJ</b>          | <b>mg/MJ</b>           | <b>mg/MJ</b>            |
| Jet/kerosene         | 2.1                   | 0.72                  | 0.02                  | 1.61         | 0.69         | 1.00                  | 0.39                  | 0.21                   | 0.19                    |
| Residual Fuel Oil    | 4.4                   | 0.81                  | 0.04                  | 1.63         | 1.12         | 1.30                  | 0.68                  | 0.50                   | 0.45                    |
| Petroleum Coke       | 2.9                   | 1.11                  | 0.03                  | 1.59         | 0.90         | 1.49                  | 0.47                  | 0.31                   | 0.27                    |
| Asphalt              | 2.5                   | 2.12                  | 0.03                  | 1.78         | 0.83         | 1.11                  | 0.42                  | 0.24                   | 0.21                    |
| Light Olefins        | 7.3                   | 1.22                  | 0.05                  | 2.45         | 2.32         | 2.56                  | 1.75                  | 0.70                   | 0.64                    |
| Naphtha              | 2.1                   | 0.68                  | 0.02                  | 1.41         | 0.67         | 0.99                  | 0.38                  | 0.21                   | 0.18                    |
| Lubricants           | 12.0                  | 1.17                  | 0.11                  | 2.58         | 2.37         | 3.69                  | 1.25                  | 1.06                   | 0.99                    |
| Miscellaneous        | 10.6                  | 0.97                  | 0.10                  | 2.12         | 2.04         | 3.29                  | 1.08                  | 0.93                   | 0.87                    |
| Waxes                | 12.0                  | 1.12                  | 0.11                  | 2.47         | 2.34         | 3.68                  | 1.24                  | 1.05                   | 0.99                    |
| <b>PADD 4</b>        |                       |                       |                       |              |              |                       |                       |                        |                         |
| LPG                  | 7.7                   | 1.49                  | 0.06                  | 2.70         | 3.64         | 3.93                  | 9.52                  | 1.97                   | 1.25                    |
| Gasoline BOB         | 9.2                   | 2.22                  | 0.08                  | 4.97         | 4.24         | 4.61                  | 2.71                  | 1.84                   | 1.09                    |
| Aviation gasoline    | 2.0                   | 0.81                  | 0.02                  | 1.23         | 1.11         | 1.22                  | 0.58                  | 0.25                   | 0.12                    |
| Diesel/distillate    | 4.6                   | 1.73                  | 0.04                  | 2.77         | 2.21         | 2.28                  | 1.66                  | 1.03                   | 0.59                    |
| Jet/kerosene         | 2.0                   | 0.81                  | 0.02                  | 1.60         | 1.11         | 1.22                  | 0.58                  | 0.25                   | 0.12                    |
| Residual Fuel Oil    | 2.7                   | 1.49                  | 0.02                  | 2.44         | 1.30         | 1.32                  | 1.29                  | 0.75                   | 0.50                    |
| Petroleum Coke       | 4.2                   | 2.33                  | 0.04                  | 3.74         | 2.75         | 2.93                  | 3.67                  | 1.52                   | 0.73                    |
| Asphalt              | 1.9                   | 2.75                  | 0.02                  | 3.91         | 1.78         | 1.67                  | 1.31                  | 0.32                   | 0.13                    |
| Light Olefins        | 7.7                   | 0.38                  | 0.06                  | 1.24         | 3.32         | 3.69                  | 9.17                  | 1.97                   | 1.25                    |
| Naphtha              | --                    | --                    | --                    | --           | --           | --                    | --                    | --                     | --                      |
| Lubricants           | --                    | --                    | --                    | --           | --           | --                    | --                    | --                     | --                      |
| Miscellaneous        | 2.7                   | 1.23                  | 0.02                  | 1.78         | 1.22         | 1.26                  | 1.19                  | 0.75                   | 0.50                    |
| Waxes                | --                    | --                    | --                    | --           | --           | --                    | --                    | --                     | --                      |
| <b>PADD 5</b>        |                       |                       |                       |              |              |                       |                       |                        |                         |
| LPG                  | 8.1                   | 0.72                  | 0.05                  | 1.52         | 2.13         | 3.11                  | 2.65                  | 0.69                   | 0.60                    |
| Gasoline BOB         | 9.6                   | 0.95                  | 0.06                  | 2.52         | 2.15         | 3.83                  | 1.42                  | 0.83                   | 0.75                    |
| Aviation gasoline    | 2.1                   | 0.95                  | 0.01                  | 2.05         | 0.72         | 1.05                  | 0.40                  | 0.28                   | 0.26                    |
| Diesel/distillate    | 6.4                   | 0.65                  | 0.04                  | 1.46         | 1.35         | 2.28                  | 0.89                  | 0.53                   | 0.48                    |
| Jet/kerosene         | 2.1                   | 0.95                  | 0.01                  | 2.11         | 0.72         | 1.05                  | 0.40                  | 0.28                   | 0.26                    |
| Residual Fuel Oil    | 3.8                   | 0.72                  | 0.03                  | 1.58         | 0.98         | 1.47                  | 0.78                  | 0.36                   | 0.31                    |
| Petroleum Coke       | 4.3                   | 1.15                  | 0.04                  | 2.22         | 1.89         | 2.51                  | 1.10                  | 0.58                   | 0.53                    |
| Asphalt              | 2.4                   | 0.86                  | 0.02                  | 1.99         | 0.77         | 1.25                  | 0.45                  | 0.30                   | 0.28                    |
| Light Olefins        | 8.1                   | 0.45                  | 0.05                  | 0.95         | 2.04         | 3.06                  | 2.63                  | 0.65                   | 0.57                    |
| Naphtha              | 2.1                   | 0.89                  | 0.01                  | 1.94         | 0.71         | 1.04                  | 0.39                  | 0.28                   | 0.25                    |
| Lubricants           | 10.5                  | 1.08                  | 0.08                  | 2.92         | 1.58         | 3.01                  | 1.02                  | 0.65                   | 0.61                    |
| Miscellaneous        | 10.5                  | 1.01                  | 0.08                  | 2.78         | 1.56         | 3.00                  | 1.00                  | 0.64                   | 0.60                    |
| Waxes                | --                    | --                    | --                    | --           | --           | --                    | --                    | --                     | --                      |

Figure S8 displays the variations of GHG emissions between gasoline BOB, diesel/distillate, and jet/kerosene in different PADD, and compares them with those from Cooney et al.<sup>[11]</sup>

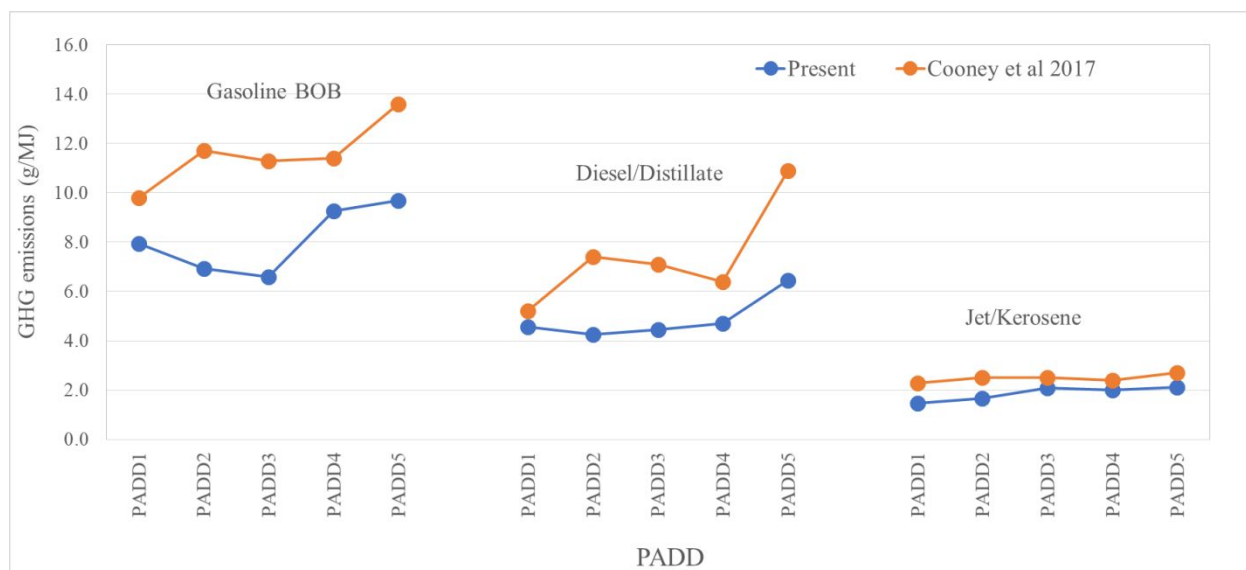

**Figure S8. Comparison of the Present Study GHG Emissions (Gasoline, Diesel/Distillate, and Jet/Kerosene Fuels in U.S. PADD Refineries in 2014) with Literature Results.**

The breakdown of the emissions associated with refinery products (U.S. average) is shown in Table S25 below.

**Table S25. Refinery GHG and CAP Emissions per MJ of Refinery Final Products in Each PADD, from Process, Combustion, and Facility-wide Sources.**

| Final Product            | CO <sub>2</sub><br>(g/MJ) | CH <sub>4</sub><br>(mg/MJ) | N <sub>2</sub> O<br>(mg/MJ) | VOC<br>(mg/MJ) | CO<br>(mg/MJ) | NO <sub>x</sub><br>(mg/MJ) | SO <sub>2</sub><br>(mg/MJ) | PM <sub>10</sub><br>(mg/MJ) | PM <sub>2.5</sub><br>(mg/MJ) |
|--------------------------|---------------------------|----------------------------|-----------------------------|----------------|---------------|----------------------------|----------------------------|-----------------------------|------------------------------|
| <b>Process Emissions</b> |                           |                            |                             |                |               |                            |                            |                             |                              |
| LPG                      | 2.30                      | 0.12                       | 0.00                        | 0.29           | 0.87          | 0.38                       | 1.40                       | 0.16                        | 0.14                         |
| Gasoline BOB             | 0.77                      | 0.05                       | 0.00                        | 0.05           | 0.03          | 0.03                       | 0.02                       | 0.02                        | 0.01                         |
| Aviation gasoline        | 0.11                      | 0.00                       | 0.00                        | 0.01           | 0.00          | 0.00                       | 0.00                       | 0.00                        | 0.00                         |
| Diesel/distillate        | 0.55                      | 0.02                       | 0.00                        | 0.03           | 0.01          | 0.02                       | 0.01                       | 0.01                        | 0.01                         |
| Jet/kerosene             | 0.13                      | 0.00                       | 0.00                        | 0.01           | 0.00          | 0.00                       | 0.00                       | 0.00                        | 0.00                         |
| Residual Fuel Oil        | 0.10                      | 0.02                       | 0.00                        | 0.03           | 0.02          | 0.02                       | 0.02                       | 0.01                        | 0.00                         |
| Petroleum Coke           | 0.32                      | 0.30                       | 0.00                        | 0.18           | 0.13          | 0.15                       | 0.14                       | 0.09                        | 0.06                         |
| Asphalt                  | 0.16                      | 0.40                       | 0.00                        | 0.03           | 0.00          | 0.00                       | 0.00                       | 0.00                        | 0.00                         |
| Light Olefins            | 2.32                      | 0.12                       | 0.00                        | 0.29           | 0.88          | 0.38                       | 1.42                       | 0.16                        | 0.14                         |

|                                                  |       |      |      |      |      |      |      |      |      |
|--------------------------------------------------|-------|------|------|------|------|------|------|------|------|
| Naphtha                                          | 0.06  | 0.00 | 0.00 | 0.01 | 0.00 | 0.00 | 0.00 | 0.00 | 0.00 |
| Lubricants                                       | 0.07  | 0.03 | 0.00 | 0.36 | 0.01 | 0.01 | 0.01 | 0.00 | 0.00 |
| Miscellaneous                                    | 0.13  | 0.02 | 0.00 | 0.28 | 0.01 | 0.01 | 0.01 | 0.01 | 0.00 |
| Waxes                                            | 0.05  | 0.03 | 0.00 | 0.39 | 0.01 | 0.00 | 0.00 | 0.00 | 0.00 |
| <b>Combustion Emissions</b>                      |       |      |      |      |      |      |      |      |      |
| LPG                                              | 5.04  | 0.26 | 0.05 | 0.17 | 1.16 | 2.16 | 0.61 | 0.42 | 0.39 |
| Gasoline BOB                                     | 6.42  | 0.31 | 0.06 | 0.23 | 1.48 | 2.70 | 0.82 | 0.60 | 0.55 |
| Aviation gasoline                                | 1.77  | 0.10 | 0.02 | 0.06 | 0.38 | 0.82 | 0.19 | 0.12 | 0.11 |
| Diesel/distillate                                | 4.08  | 0.20 | 0.04 | 0.14 | 0.90 | 1.63 | 0.52 | 0.37 | 0.34 |
| Jet/kerosene                                     | 1.71  | 0.09 | 0.02 | 0.06 | 0.38 | 0.78 | 0.18 | 0.11 | 0.11 |
| Residual Fuel Oil                                | 3.70  | 0.15 | 0.03 | 0.12 | 0.71 | 1.12 | 0.53 | 0.35 | 0.32 |
| Petroleum Coke                                   | 2.88  | 0.16 | 0.03 | 0.10 | 0.61 | 1.33 | 0.29 | 0.18 | 0.17 |
| Asphalt                                          | 1.95  | 0.11 | 0.02 | 0.07 | 0.63 | 1.10 | 0.45 | 0.15 | 0.14 |
| Light Olefins                                    | 5.06  | 0.26 | 0.05 | 0.17 | 1.17 | 2.17 | 0.61 | 0.42 | 0.39 |
| Naphtha                                          | 1.83  | 0.11 | 0.02 | 0.06 | 0.33 | 0.82 | 0.18 | 0.12 | 0.11 |
| Lubricants                                       | 11.46 | 0.55 | 0.10 | 0.34 | 2.00 | 3.60 | 1.75 | 0.68 | 0.64 |
| Miscellaneous                                    | 9.37  | 0.45 | 0.08 | 0.29 | 1.85 | 2.94 | 1.13 | 0.61 | 0.57 |
| Waxes                                            | 10.85 | 0.53 | 0.10 | 0.33 | 2.15 | 3.36 | 1.19 | 0.70 | 0.66 |
| <b>Facility-wide Emissions (FWE-1 and FWE-2)</b> |       |      |      |      |      |      |      |      |      |
| LPG                                              | 0.07  | 0.47 | 0.00 | 1.22 | 0.35 | 0.28 | 0.22 | 0.20 | 0.14 |
| Gasoline BOB                                     | 0.08  | 0.58 | 0.00 | 1.79 | 0.43 | 0.34 | 0.28 | 0.23 | 0.17 |
| Aviation gasoline                                | 0.09  | 0.59 | 0.00 | 1.33 | 0.36 | 0.20 | 0.24 | 0.11 | 0.08 |
| Diesel/distillate                                | 0.08  | 0.56 | 0.00 | 1.38 | 0.37 | 0.25 | 0.26 | 0.15 | 0.11 |
| Jet/kerosene                                     | 0.07  | 0.57 | 0.00 | 1.42 | 0.34 | 0.21 | 0.22 | 0.12 | 0.09 |
| Residual Fuel Oil                                | 0.07  | 0.56 | 0.00 | 1.39 | 0.33 | 0.22 | 0.21 | 0.11 | 0.09 |
| Petroleum Coke                                   | 0.10  | 0.69 | 0.00 | 1.57 | 0.43 | 0.27 | 0.30 | 0.17 | 0.12 |
| Asphalt                                          | 0.10  | 0.67 | 0.00 | 1.45 | 0.36 | 0.24 | 0.37 | 0.13 | 0.08 |
| Light Olefins                                    | 0.09  | 0.57 | 0.00 | 1.51 | 0.45 | 0.31 | 0.25 | 0.20 | 0.15 |
| Naphtha                                          | 0.09  | 0.53 | 0.00 | 1.25 | 0.36 | 0.17 | 0.21 | 0.10 | 0.07 |
| Lubricants                                       | 0.08  | 0.53 | 0.00 | 1.79 | 0.45 | 0.47 | 0.23 | 0.31 | 0.28 |
| Miscellaneous                                    | 0.07  | 0.48 | 0.00 | 1.57 | 0.39 | 0.40 | 0.23 | 0.27 | 0.21 |
| Waxes                                            | 0.08  | 0.49 | 0.00 | 1.64 | 0.44 | 0.39 | 0.26 | 0.33 | 0.27 |

The refinery onsite GHG and CAP emissions allocated to various products are itemized by refinery process units, shown in the figures below.

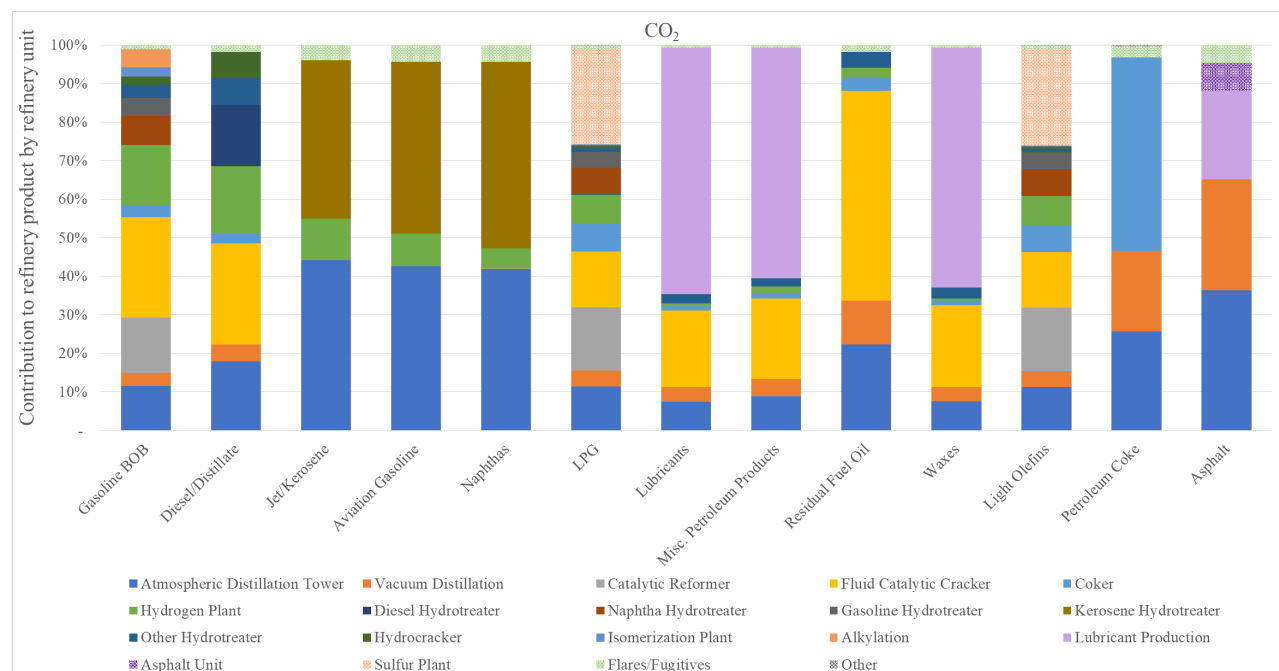

**Figure S9. The Refinery Onsite CO<sub>2</sub> Emissions Allocated to Products from Various Refinery Units.**

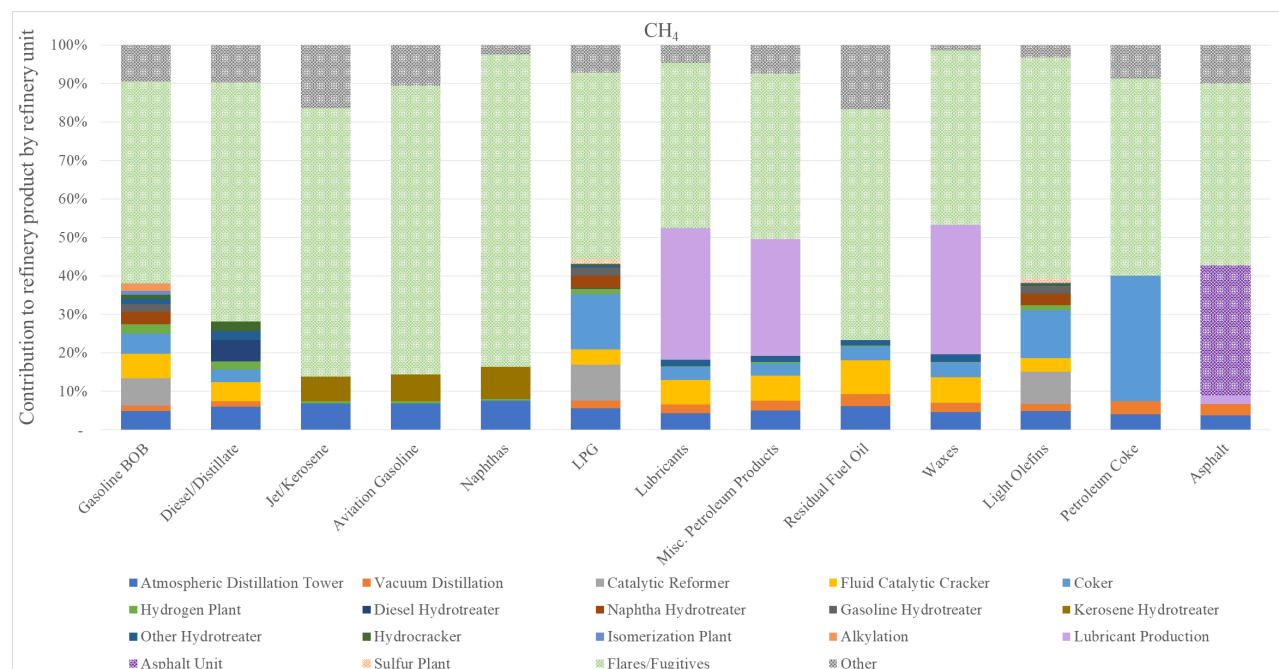

**Figure S10. The Refinery Onsite CH<sub>4</sub> Emissions Allocated to Products from Various Refinery Units.**

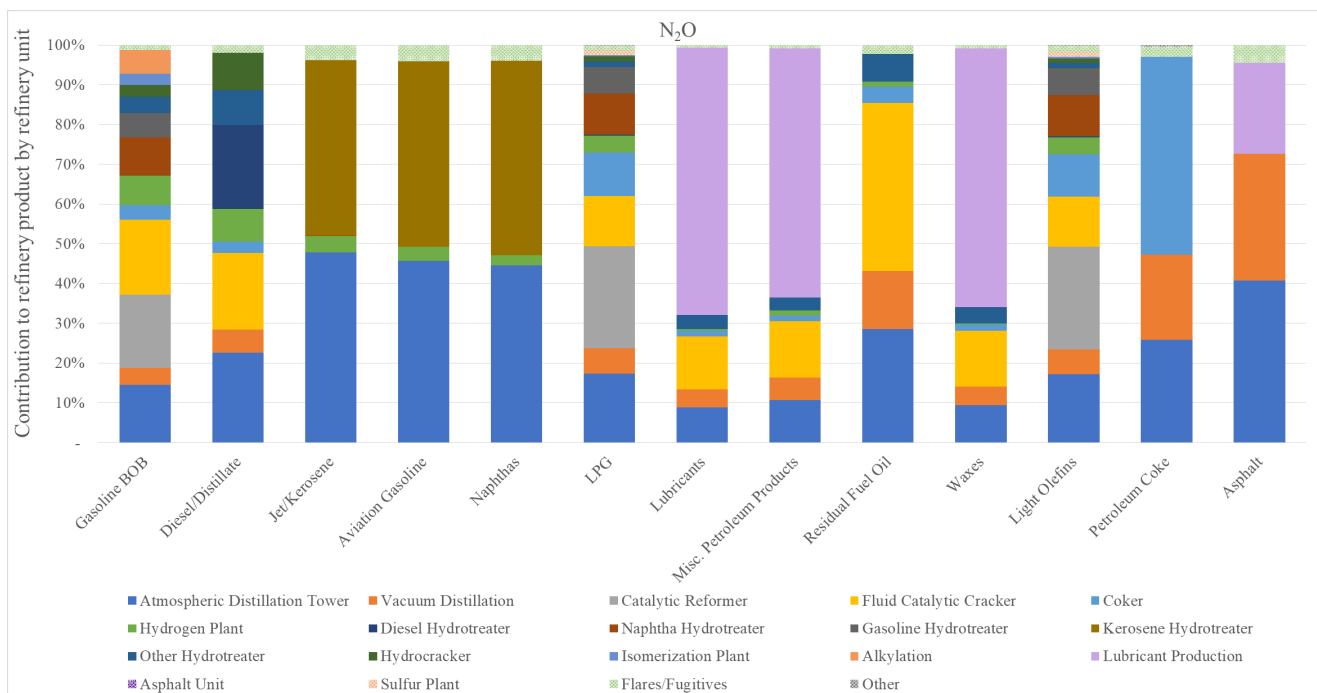

**Figure S11. The Refinery Onsite N<sub>2</sub>O Emissions Allocated to Products from Various Refinery Units.**

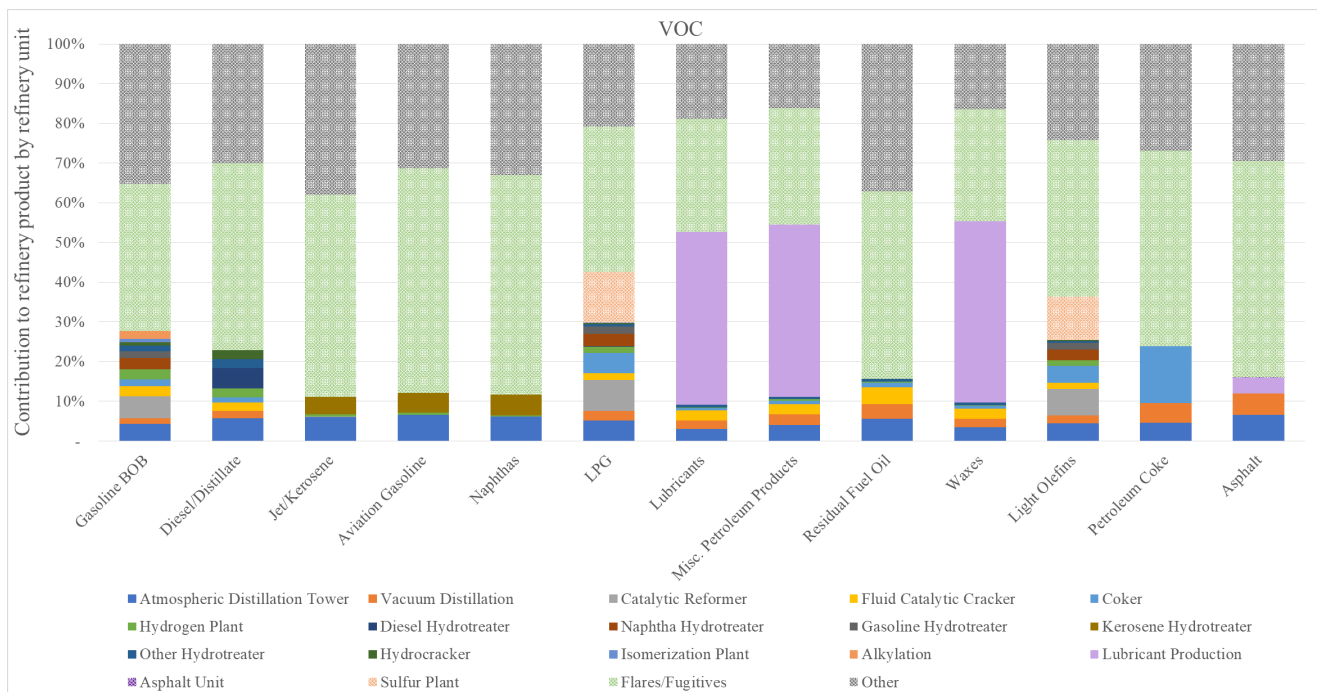

**Figure S12. The Refinery Onsite VOC Emissions Allocated to Products from Various Refinery Units.**



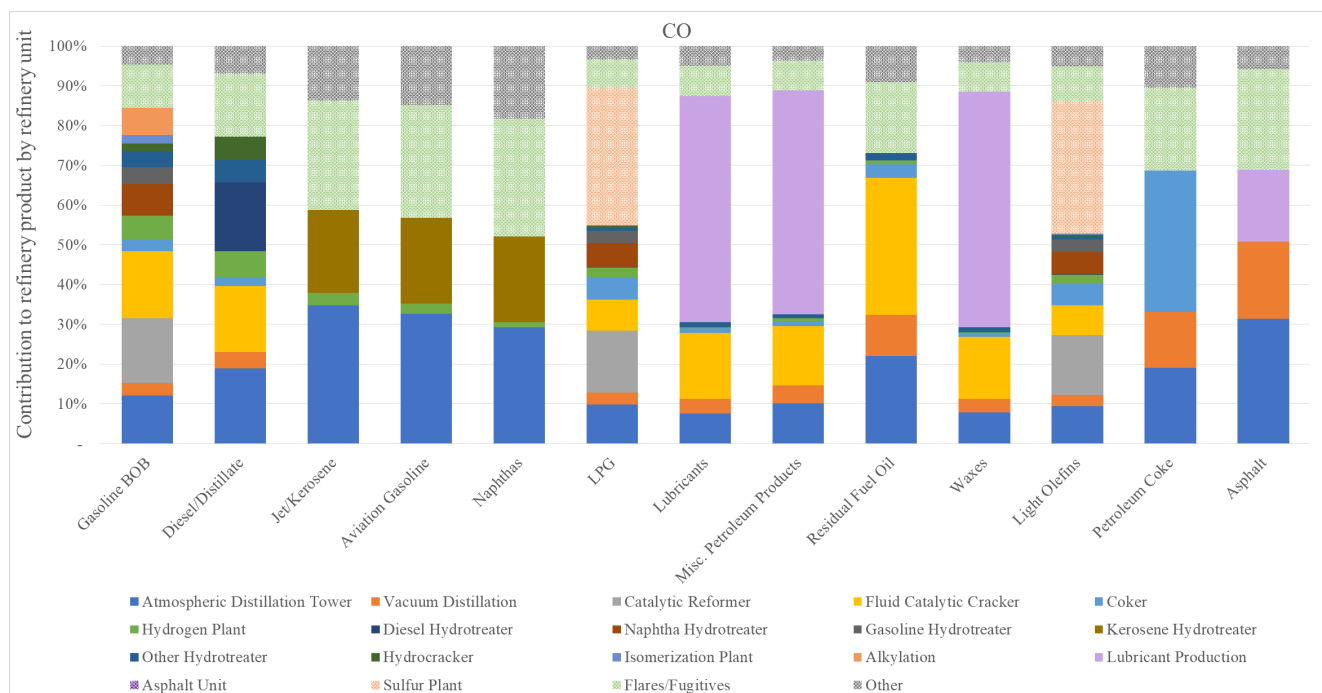

**Figure S13. The Refinery Onsite CO Emissions Allocated to Products from Various Refinery Units.**

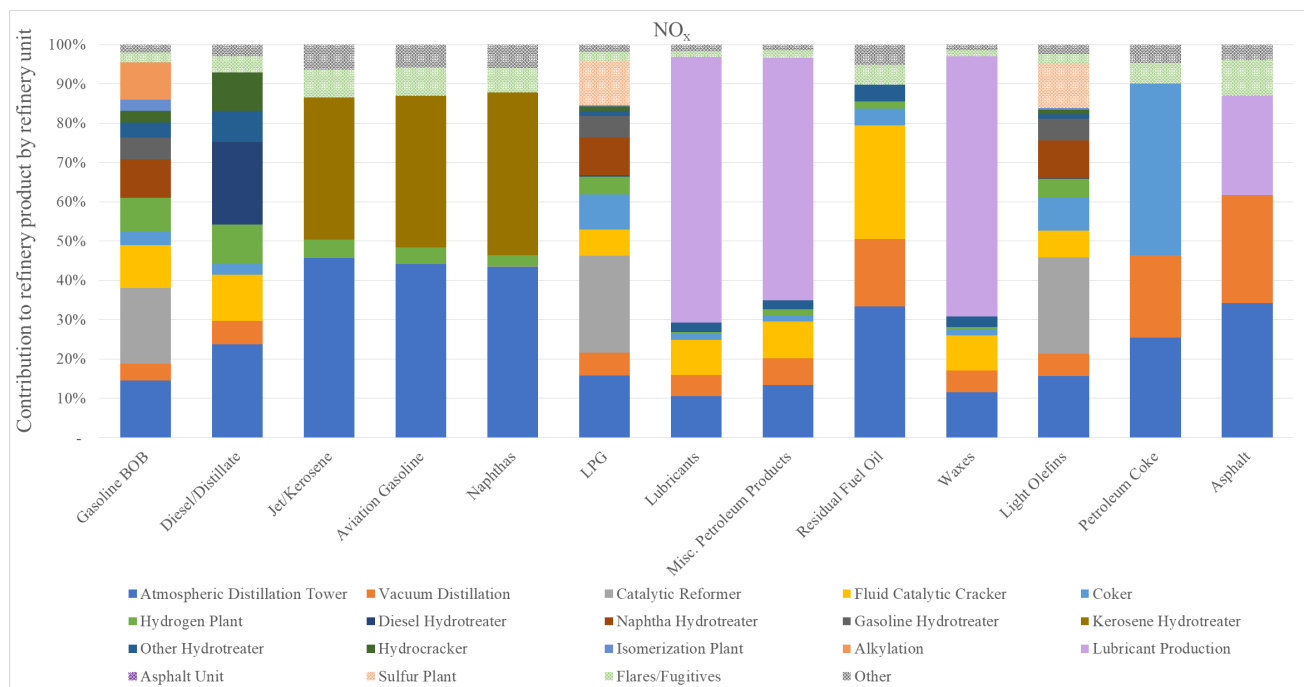

**Figure S14. The Refinery Onsite NO<sub>x</sub> Emissions Allocated to Products, from Various Refinery Units.**

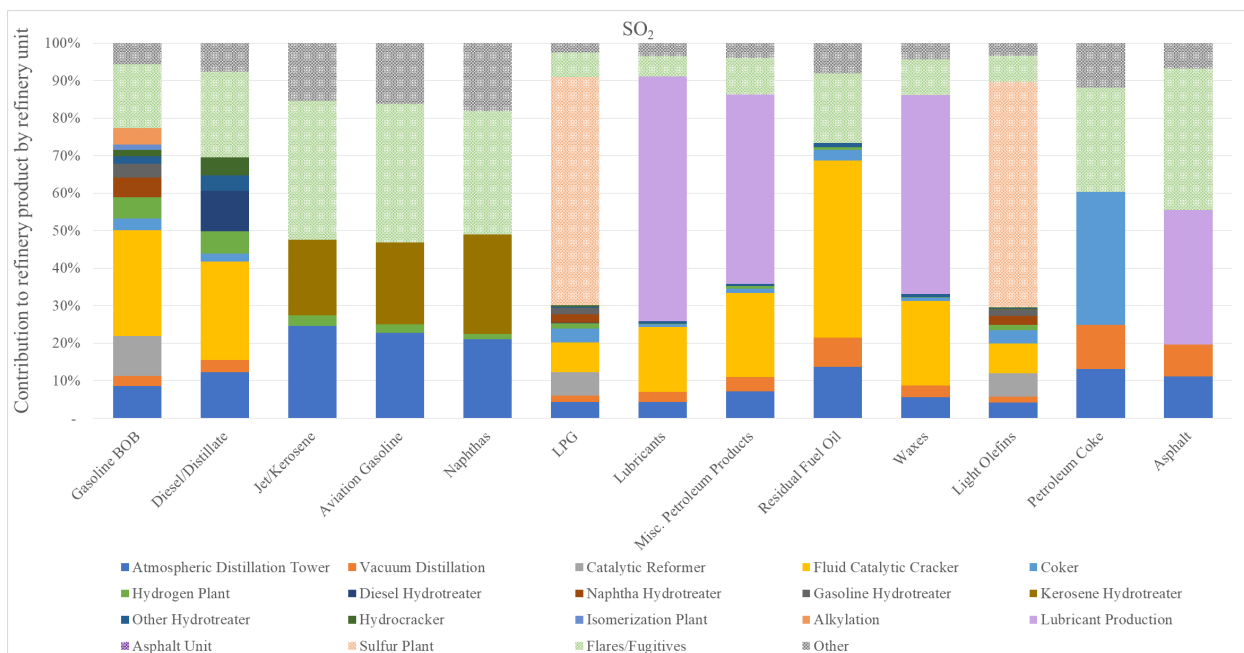

**Figure S15. The Refinery Onsite SO<sub>2</sub> Emissions Allocated to Products from Various Refinery Units.**

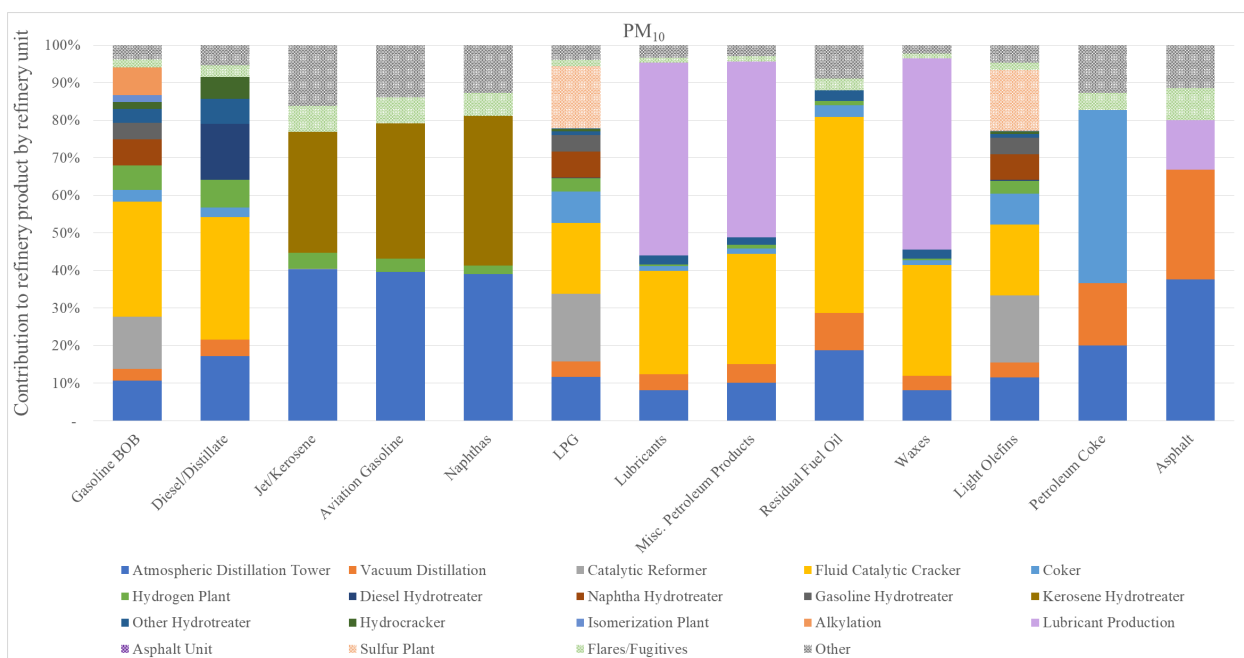

**Figure S16. The Refinery Onsite PM<sub>10</sub> Emissions Allocated to Products from Various Refinery Units.**

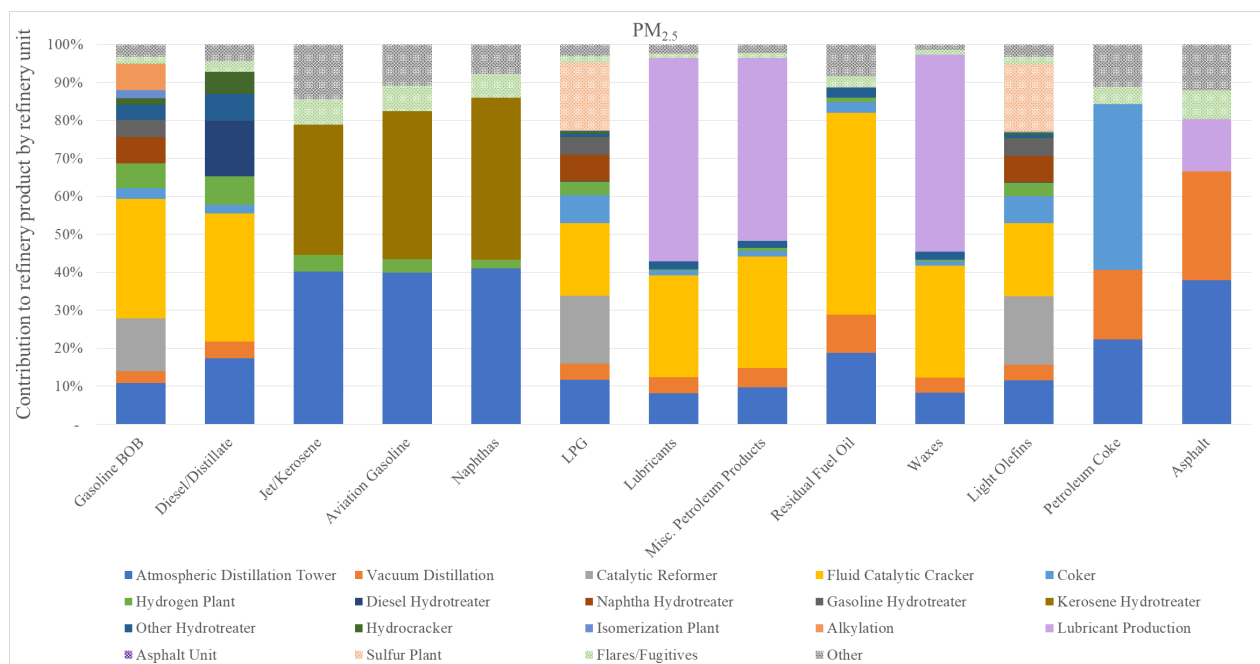

**Figure S17. The Refinery Onsite PM<sub>2.5</sub> Emissions Allocated to Products from Various Refinery Units.**

## Reference

<sup>S1</sup> Young, B.; Morelli, B.; Hawkins, T. R.; Creation of Unit Process Data for Life Cycle Assessment of Steam Methane Reforming and Petroleum Refining; Eastern Research Group: [https://greet.es.anl.gov/publication-air\\_pollutants\\_smr\\_petroleum](https://greet.es.anl.gov/publication-air_pollutants_smr_petroleum).
